# Supplementary material
Source: PubMed Central journal article supplement (PMC9379852)
Supplement: NIHMS1825908-supplement-Supplementary_Online_Material.pdf [file NIHMS1825908-supplement-Supplementary_Online_Material.pdf]

## Supplementary Online Content

Daneshjou R, Smith MP, Sun MD, Rotemberg V, Zou J. Lack of transparency and potential bias in artificial intelligence data sets and algorithms: a scoping review. *JAMA Dermatol*. Published online September 22, 2021. doi:10.1001/jamadermatol.2021.3129

**eTable.** Table of Characteristics Assessed in Each Study

**eMethods.** Gold Standard Used

**eFigure.** Mappings

**eReferences**

This supplementary material has been provided by the authors to give readers additional information about their work.

eTable. Table of Characteristics Assessed in Each Study

| Title                                                                                                                                                                 | PMID     | Pub Year | Dataset Sources                                                                                                                                        | Use of Dataset (Train, Internal Validation, Test, and/or External Validation) | Number of images used                               | Number of patients        | Clinical or Dermoscopic | Diseases                                                                                                                                                                                                                                            | Label                                                                                                                                | Gold Standard? (Y/N)                                                                                                                  | Fitzpatrick skin type description and breakdown (Y/N)                                                                                                                       | Ethnicity or race description and breakdown (Y/N)                                                                                                              | Data Available (Y/N) | Image processing described (Y/N) | External test set used for statistical reporting? (Y/N) | Data evaluated in intended use setting by dermatologist (Reader study include)? (Y/N) | Model Available? (Y/N) |
|-----------------------------------------------------------------------------------------------------------------------------------------------------------------------|----------|----------|--------------------------------------------------------------------------------------------------------------------------------------------------------|-------------------------------------------------------------------------------|-----------------------------------------------------|---------------------------|-------------------------|-----------------------------------------------------------------------------------------------------------------------------------------------------------------------------------------------------------------------------------------------------|--------------------------------------------------------------------------------------------------------------------------------------|---------------------------------------------------------------------------------------------------------------------------------------|-----------------------------------------------------------------------------------------------------------------------------------------------------------------------------|----------------------------------------------------------------------------------------------------------------------------------------------------------------|----------------------|----------------------------------|---------------------------------------------------------|---------------------------------------------------------------------------------------|------------------------|
| A convolutional neural network trained with dermoscopic images performed on par with 145 dermatologists in a clinical melanoma image classification task <sup>1</sup> | 30852421 | 2019     | Combination of ISIC Archive and HAM10000 (ISIC 2018 Train)                                                                                             | Train, Internal Validation                                                    | 12378 (Train set)<br>1359 (Internal validation set) | Not specified             | Dermoscopic             | Atypical nevi, melanoma                                                                                                                                                                                                                             | Melanomas – pathology<br>Nevi – pathology (~24%), expert consensus panel of dermatologists (~54%), monitoring temporal change (~22%) | Melanomas – Y<br>Nevi – Y                                                                                                             | N                                                                                                                                                                           | N                                                                                                                                                              | Y                    | N                                | Y                                                       | N                                                                                     | N                      |
|                                                                                                                                                                       |          |          | MClass-Benchmark for clinical images collected from Department of Dermatology of the University Medical Center Groningen (subset of MED-NODE database) | Test                                                                          | 100                                                 | Not specified             | Clinical                | Nevi, melanoma                                                                                                                                                                                                                                      | Melanomas – pathology<br>Nevi – expert consensus panel of dermatologists                                                             | Melanomas – Y<br>Nevi – Y                                                                                                             | N                                                                                                                                                                           | N                                                                                                                                                              | Y                    | N                                |                                                         |                                                                                       |                        |
| A deep learning system for differential diagnosis of skin diseases <sup>2</sup>                                                                                       | 32424212 | 2020     | Teledermatology service serving 17 primary-care and specialist sites from two states in the United States                                              | Train, Internal Validation                                                    | 64,837 for training                                 | 16,114 cases for training | Clinical                | Acne, Actinic keratosis, Allergic contact dermatitis, Alopecia areata, Androgenetic alopecia, Basal cell carcinoma, Cyst, Eczema, Folliculitis, Hidradenitis, Lentigo, Melanocytic nevus, Melanoma, Post inflammatory hyperpigmentation, Psoriasis, | Expert consensus panel of dermatologists                                                                                             | Benign lesions: Y<br>Basal cell carcinoma: N<br>Melanoma: N<br>Squamous cell carcinoma/squamous cell carcinoma in situ (SCC/SCCIS): N | Y<br>Type I: 46 (0.3%)<br>Type II: 2,807 (17.4%)<br>Type III: 6,641 (41.2%)<br>Type IV: 5,040 (31.3%)<br>Type V: 510 (3.2%)<br>Type VI: 46 (0.3%)<br>Unknown: 1,024 (10.2%) | Y<br>American Indian or Alaska Native: 142 (0.1%)<br>Asian: 1,775 (11.0%)<br>Black or African American: 1,087 (6.8%)<br>Hispanic or Latino: 7,044 (43.7%)<br>Y | N                    | Y                                | N                                                       | Y                                                                                     | N                      |

| Title                                                                                                     | PMID     | Pub Year | Dataset Sources                                                                         | Use of Dataset (Train, Internal Validation, Test, and/or External Validation) | Number of images used     | Number of patients                                                | Clinical or Dermoscopic | Diseases                                                                                                                                            | Label                                                                                                                                    | Gold Standard? (Y/N)                                                                                                                  | Fitzpatrick skin type description and breakdown (Y/N)                                                                                                                            | Ethnicity or race description and breakdown (Y/N)                                                                                                                                                                                                           | Data Available (Y/N)           | Image processing described (Y/N) | External test set used for statistical reporting? (Y/N) | Data evaluated in intended use setting by dermatologist (Reader study include)? (Y/N) | Model Available? (Y/N)                                                |  |
|-----------------------------------------------------------------------------------------------------------|----------|----------|-----------------------------------------------------------------------------------------|-------------------------------------------------------------------------------|---------------------------|-------------------------------------------------------------------|-------------------------|-----------------------------------------------------------------------------------------------------------------------------------------------------|------------------------------------------------------------------------------------------------------------------------------------------|---------------------------------------------------------------------------------------------------------------------------------------|----------------------------------------------------------------------------------------------------------------------------------------------------------------------------------|-------------------------------------------------------------------------------------------------------------------------------------------------------------------------------------------------------------------------------------------------------------|--------------------------------|----------------------------------|---------------------------------------------------------|---------------------------------------------------------------------------------------|-----------------------------------------------------------------------|--|
|                                                                                                           |          |          |                                                                                         |                                                                               |                           |                                                                   |                         | Squamous cell carcinoma/squamous cell carcinoma in situ (SCC/SCCIS), Seborrheic keratosis/irritated seborrheic keratosis                            |                                                                                                                                          |                                                                                                                                       |                                                                                                                                                                                  | Native Hawaiian or Pacific Islander: 224 (1.4%)<br>White: 5,475 (34.0%)<br>Not specified: 367 (2.2%)                                                                                                                                                        |                                |                                  |                                                         |                                                                                       |                                                                       |  |
|                                                                                                           |          |          |                                                                                         | Test                                                                          | 14,883 images for testing | 3,756 cases for testing                                           | Clinical                | (SK/ISK), Scar condition, Seborrheic dermatitis, Skin tag, Stasis dermatitis, Tinea, Tinea versicolor, Urticaria, Verruca vulgaris, Vitiligo, Other | 52 cases of malignancy were biopsied (32 BCC, 6 melanoma, 14 SCC/SCCIS). All others were by an expert consensus panel of dermatologists. | Benign lesions: Y<br>Basal cell carcinoma: N<br>Melanoma: N<br>Squamous cell carcinoma/squamous cell carcinoma in situ (SCC/SCCIS): N | Y<br>Type I: 9 (0.2%)<br>Type II: 2,807 (17.4%) 383 (10.2%)<br>Type III: 2,412 (64.2%)<br>Type IV: 724 (19.3%)<br>Type V: 101 (2.7%)<br>Type VI: 1 (0.0%)<br>Unknown: 126 (3.4%) | Y<br>American Indian or Alaska Native: 42 (0.1%)<br>Asian: 473 (12.6%)<br>Black or African American: 229 (6.1%)<br>Hispanic or Latino: 1,631 (43.4%)<br>Native Hawaiian or Pacific Islander: 61 (1.6%)<br>White: 1,175 (31.3%)<br>Not specified: 145 (3.9%) | N                              | Y                                |                                                         |                                                                                       |                                                                       |  |
| A deep learning, image-based approach for automated diagnosis for inflammatory skin diseases <sup>3</sup> | 32566608 | 2020     | Department of Dermatology, The Second Xiangya Hospital, Central South University, China | Train, Internal Validation, Test                                              | 4740                      | Not specified; mentioned that images may be from the same patient | Clinical                | Psoriasis, eczema, atopic dermatitis and healthy skin                                                                                               | Consensus panel of dermatologists                                                                                                        | Y                                                                                                                                     | N                                                                                                                                                                                | N                                                                                                                                                                                                                                                           | N                              | Y                                | N                                                       | N                                                                                     | Y<br>Smartphone application publicly available to physicians in China |  |
| A GAN-based image synthesis method for skin lesion classification <sup>4</sup>                            | 32526536 | 2020     | HAM10000 (ISIC 2018 Train)                                                              | Train, Internal Validation, Test                                              | 10,015                    | Not specified                                                     | Dermoscopic             | Actinic keratosis, Intraepithelial carcinoma (Bowen's), Basal cell carcinoma,                                                                       | Actinic keratosis: consensus, Intraepithelial carcinoma (Bowen's):                                                                       | Actinic keratosis: Y, Intraepithelial carcinoma (Bowen's): Y, Basal cell                                                              | N                                                                                                                                                                                | N                                                                                                                                                                                                                                                           | Y<br>Data available on request | Y                                | N                                                       | N                                                                                     | N                                                                     |  |

| Title                                                                                                                             | PMID     | Pub Year | Dataset Sources                                                        | Use of Dataset (Train, Internal Validation, Test, and/or External Validation) | Number of images used                                    | Number of patients | Clinical or Dermoscopic | Diseases                                                                                                                                 | Label                                                                                                                                                                                  | Gold Standard? (Y/N)                                                                                             | Fitzpatrick skin type description and breakdown (Y/N) | Ethnicity or race description and breakdown (Y/N) | Data Available (Y/N) | Image processing described (Y/N) | External test set used for statistical reporting? (Y/N) | Data evaluated in intended use setting by dermatologist (Reader study include)? (Y/N) | Model Available? (Y/N) |
|-----------------------------------------------------------------------------------------------------------------------------------|----------|----------|------------------------------------------------------------------------|-------------------------------------------------------------------------------|----------------------------------------------------------|--------------------|-------------------------|------------------------------------------------------------------------------------------------------------------------------------------|----------------------------------------------------------------------------------------------------------------------------------------------------------------------------------------|------------------------------------------------------------------------------------------------------------------|-------------------------------------------------------|---------------------------------------------------|----------------------|----------------------------------|---------------------------------------------------------|---------------------------------------------------------------------------------------|------------------------|
|                                                                                                                                   |          |          |                                                                        |                                                                               |                                                          |                    |                         | Benign keratosis, Dermatofibroma, Melanocytic nevi, Vascular skin lesions, Melanoma                                                      | pathology, Basal cell carcinoma: pathology, Benign keratosis: consensus, Dermatofibroma: consensus, Melanocytic nevi: consensus, Vascular skin lesions: consensus, Melanoma: consensus | carcinoma: Y, Benign keratosis: Y, Dermatofibroma: Y, Melanocytic nevi: Y, Vascular skin lesions: Y, Melanoma: Y |                                                       |                                                   |                      |                                  |                                                         |                                                                                       |                        |
| A machine learning-based, decision support, mobile phone application for diagnosis of common dermatological diseases <sup>5</sup> | 32991767 | 2020     | Dermatology practices across India                                     | Train, Internal Validation, Test                                              | 7501 (This number was derived from Table 1 of the paper) | Not specified      | Clinical                | Acne, Actinic keratosis, Alopecia, Anogenital warts, Basal cell carcinoma, Bowen's disease, Bullous                                      | Not specified                                                                                                                                                                          | Cannot be determined                                                                                             | N                                                     | N                                                 | N                    | Y                                | Y                                                       | Y                                                                                     | N                      |
|                                                                                                                                   |          |          | Public databases (Hellenic Dermatological Atlas, Atlas of Dermatology) | Train, Internal Validation, Test                                              | 8227 (This number was derived from Table 1 of the paper) | Not specified      | Clinical                | pemphigoid, Candidiasis, Chicken pox, Discoid lupus erythematosus, Eczema, Fixed drug eruption, Herpes zoster, Hidradenitis suppurativa, | Not specified                                                                                                                                                                          | Cannot be determined                                                                                             | N                                                     | N                                                 | Y                    | Y                                |                                                         |                                                                                       |                        |

| Title | PMID | Pub Year | Dataset Sources                                                                                                                                                   | Use of Dataset (Train, Internal Validation, Test, and/or External Validation) | Number of images used | Number of patients | Clinical or Dermoscopic | Diseases                                                                                                                                                                                                                                                                                                                                                                                                                                                            | Label                                                                                                | Gold Standard? (Y/N) | Fitzpatrick skin type description and breakdown (Y/N) | Ethnicity or race description and breakdown (Y/N) | Data Available (Y/N) | Image processing described (Y/N) | External test set used for statistical reporting? (Y/N) | Data evaluated in intended use setting by dermatologist (Reader study include)? (Y/N) | Model Available? (Y/N) |
|-------|------|----------|-------------------------------------------------------------------------------------------------------------------------------------------------------------------|-------------------------------------------------------------------------------|-----------------------|--------------------|-------------------------|---------------------------------------------------------------------------------------------------------------------------------------------------------------------------------------------------------------------------------------------------------------------------------------------------------------------------------------------------------------------------------------------------------------------------------------------------------------------|------------------------------------------------------------------------------------------------------|----------------------|-------------------------------------------------------|---------------------------------------------------|----------------------|----------------------------------|---------------------------------------------------------|---------------------------------------------------------------------------------------|------------------------|
|       |      |          | All India Institute of Medical Sciences in New Delhi, an urban private practice in Gurugram, Haryana, India, and a rural health center in Jhajjar, Haryana, India | External Validation                                                           | 4254                  | 4254               | Clinical                | Ichthyosis, Impetigo and Pyodermas, Keloids/Hypertrophic scar, Keratoacanthoma, Lichen planus, Lichen sclerosus, Melanocytic nevi/Mole, Melanoma, Melasma, Milia, Molluscum contagiosum, Pemphigus, Pityriasis rosea, Pityriasis versicolor, Psoriasis, Rosacea, Seborrheic keratosis, Squamous cell carcinoma, Tinea capitis, Tinea cruris, corporis or faciei, Tinea manuum, Tinea pedis, Tinea unguium, Urticaria, Viral warts, Vitiligo/Leucoderma, Normal skin | Clinical examination, laboratory investigation and/or histopathology<br><br>Not specified by disease | Cannot be determined | N                                                     | N                                                 | N                    | Y                                |                                                         |                                                                                       |                        |

| Title                                                                                                                                       | PMID     | Pub Year | Dataset Sources                                | Use of Dataset (Train, Internal Validation, Test, and/or External Validation) | Number of images used                                                                       | Number of patients | Clinical or Dermoscopic | Diseases                                                    | Label                                                                                           | Gold Standard? (Y/N)            | Fitzpatrick skin type description and breakdown (Y/N) | Ethnicity or race description and breakdown (Y/N) | Data Available (Y/N)                                                                                            | Image processing described (Y/N) | External test set used for statistical reporting? (Y/N) | Data evaluated in intended use setting by dermatologist (Reader study include)? (Y/N)                                                                         | Model Available? (Y/N)                                 |
|---------------------------------------------------------------------------------------------------------------------------------------------|----------|----------|------------------------------------------------|-------------------------------------------------------------------------------|---------------------------------------------------------------------------------------------|--------------------|-------------------------|-------------------------------------------------------------|-------------------------------------------------------------------------------------------------|---------------------------------|-------------------------------------------------------|---------------------------------------------------|-----------------------------------------------------------------------------------------------------------------|----------------------------------|---------------------------------------------------------|---------------------------------------------------------------------------------------------------------------------------------------------------------------|--------------------------------------------------------|
| A patient-oriented, general-practitioner-level, deep-learning-based cutaneous pigmented lesion risk classifier on a smartphone <sup>6</sup> | 31907926 | 2020     | Taipei Medical University                      | Train, Internal Validation, Test                                              | 5289                                                                                        | 4635               | Clinical                | “High risk” and “low risk” pigmented lesions                | High risk: consensus panel of dermatologists<br><br>Low risk: consensus panel of dermatologists | High risk: N<br><br>Low risk: Y | N                                                     | Y<br><br>100% Asian                               | N                                                                                                               | Y                                | N                                                       | N<br><br>(states that images were reserved “for later comparison of performance between models and general practitioners,” but no such results are presented) | N                                                      |
| A Point-of-Care, Real-Time Artificial Intelligence System to Support Clinician Diagnosis of a Wide Range of Skin Diseases <sup>7</sup>      | 33065109 | 2020     | VisualDx                                       | Train, Internal Validation, Test                                              | 76,926<br>(69,195 training images, 3,869 internal validation images, and 3,862 test images) | Not specified      | Clinical                | No disease: characterizing morphology                       | No disease; morphology by consensus panel of dermatologists                                     | Cannot be determined            | N                                                     | N                                                 | Y<br><br>VisualDx data is available with a subscription (additional permission needed for machine learning use) | N                                | Y                                                       | N<br><br>(evaluated against board-certified internal medicine doctors but not dermatologists)                                                                 | Y<br><br>VisualDx DermExpert is commercially available |
|                                                                                                                                             |          |          | Dataset 1: Selected by authors, not specified. | External Test                                                                 | 16                                                                                          | Not specified      | Clinical                | No disease; morphology by consensus panel of dermatologists | Cannot be determined                                                                            | N                               | N                                                     | N                                                 | N                                                                                                               |                                  |                                                         |                                                                                                                                                               |                                                        |

| Title                                                                                                                                                                  | PMID     | Pub Year | Dataset Sources                                                                                                                                      | Use of Dataset (Train, Internal Validation, Test, and/or External Validation) | Number of images used | Number of patients | Clinical or Dermoscopic | Diseases                                                                                                        | Label                                                       | Gold Standard? (Y/N) | Fitzpatrick skin type description and breakdown (Y/N) | Ethnicity or race description and breakdown (Y/N) | Data Available (Y/N) | Image processing described (Y/N) | External test set used for statistical reporting? (Y/N) | Data evaluated in intended use setting by dermatologist (Reader study include)? (Y/N)   | Model Available? (Y/N) |
|------------------------------------------------------------------------------------------------------------------------------------------------------------------------|----------|----------|------------------------------------------------------------------------------------------------------------------------------------------------------|-------------------------------------------------------------------------------|-----------------------|--------------------|-------------------------|-----------------------------------------------------------------------------------------------------------------|-------------------------------------------------------------|----------------------|-------------------------------------------------------|---------------------------------------------------|----------------------|----------------------------------|---------------------------------------------------------|-----------------------------------------------------------------------------------------|------------------------|
|                                                                                                                                                                        |          |          | Dataset 2: Selected by authors, not specified                                                                                                        | External Test                                                                 | 222                   | Not specified      | Clinical                |                                                                                                                 | No disease; morphology by consensus panel of dermatologists | Cannot be determined | Y<br>Types I-III: 169<br>Types IV-VI: 53              | N                                                 | N                    | Y                                |                                                         |                                                                                         |                        |
| A pretrained neural network shows similar diagnostic accuracy to medical students in categorizing dermoscopic images after comparable training conditions <sup>8</sup> | 28569993 | 2017     | Not specified                                                                                                                                        | Train, Internal Validation                                                    | 298                   | Not specified      | Dermoscopic             | Basal cell carcinomas, dermatofibromas, melanomas, melanocytic naevi, seborrheic keratoses and vascular lesions | Not specified                                               | Cannot be determined | N                                                     | N                                                 | N                    | N                                | N                                                       | N<br><br>(Medical students evaluated against the model's output but not dermatologists) | N                      |
|                                                                                                                                                                        |          |          | Not specified                                                                                                                                        | Test                                                                          | 50                    | Not specified      | Dermoscopic             |                                                                                                                 | Not specified                                               | Cannot be determined | N                                                     | N                                                 | N                    | N                                |                                                         |                                                                                         |                        |
| A superpixel-driven deep learning approach for the analysis of dermatological wounds <sup>9</sup>                                                                      | 31542688 | 2020     | Neurovascular Ulcers Outpatient Clinic of the Clinical Hospital of the University of São Paulo, Ribeirão Preto, São Paulo, Brazil                    | Train, Internal Validation, Test                                              | 217                   | Not specified      | Clinical                | Arterial and venous ulcers (for wound quantification)                                                           | Clinical diagnosis                                          | Y                    | N                                                     | N                                                 | Y                    | Y                                | N                                                       | N                                                                                       | Y                      |
| Acral melanoma detection using a convolutional neural network for dermoscopy images <sup>10</sup>                                                                      | 29513718 | 2018     | Severance Hospital in the Yonsei University Health System, Seoul, Korea and Dongsan Hospital in the Keimyung University Health System, Daegu, Korea. | Train, Internal Validation, Test                                              | 724                   | 275                | Dermoscopic             | Aacral melanoma and benign nevi                                                                                 | Pathology confirmed                                         | Y                    | N                                                     | Y<br>"Asians"                                     | Y                    | Y                                | N                                                       | Y<br><br>(compared diagnostic rate of model with those of 2 dermatologists)             | N                      |
| Artificial Intelligence and Its Effect on Dermatologists' Accuracy in Dermoscopic                                                                                      | 32915161 | 2020     | ISIC Archive, with a large fraction of images coming from a subset of                                                                                | Train Internal Validation Test                                                | 4944                  | Not specified      | Dermoscopic             | Melanoma and benign nevus                                                                                       | Pathology confirmed                                         | Y                    | N                                                     | N                                                 | Y                    | Y                                | N                                                       | Y                                                                                       | N                      |

| Title                                                                                                                                                                                  | PMID     | Pub Year | Dataset Sources                                                                                      | Use of Dataset (Train, Internal Validation, Test, and/or External Validation) | Number of images used                            | Number of patients | Clinical or Dermoscopic | Diseases                            | Label                                                                                                                                                                     | Gold Standard? (Y/N)            | Fitzpatrick skin type description and breakdown (Y/N)                                                                                               | Ethnicity or race description and breakdown (Y/N)                    | Data Available (Y/N) | Image processing described (Y/N) | External test set used for statistical reporting? (Y/N) | Data evaluated in intended use setting by dermatologist (Reader study include)? (Y/N) | Model Available? (Y/N) |
|----------------------------------------------------------------------------------------------------------------------------------------------------------------------------------------|----------|----------|------------------------------------------------------------------------------------------------------|-------------------------------------------------------------------------------|--------------------------------------------------|--------------------|-------------------------|-------------------------------------|---------------------------------------------------------------------------------------------------------------------------------------------------------------------------|---------------------------------|-----------------------------------------------------------------------------------------------------------------------------------------------------|----------------------------------------------------------------------|----------------------|----------------------------------|---------------------------------------------------------|---------------------------------------------------------------------------------------|------------------------|
| Melanoma Image Classification: Web-Based Survey Study <sup>11</sup>                                                                                                                    |          |          | HAM10000 (ISIC 2018 Train)                                                                           |                                                                               |                                                  |                    |                         |                                     |                                                                                                                                                                           |                                 |                                                                                                                                                     |                                                                      |                      |                                  |                                                         |                                                                                       |                        |
| Assessing the effectiveness of artificial intelligence methods for melanoma: A retrospective review <sup>12</sup>                                                                      | 31255749 | 2019     | ISIC Archive, subset of dermoscopic images from ISDIS-ISIC (no specification of which year/what set) | Train, Internal Validation, Test                                              | 2200                                             | Not specified      | Dermoscopic             | Melanoma and non-melanoma           | Benign (non-melanoma): expert consensus<br>Malignant (melanoma): pathology                                                                                                | Non-melanoma: Y<br>Melanoma – Y | N                                                                                                                                                   | N                                                                    | Y                    | Y                                | N                                                       | N                                                                                     | N                      |
| Assessment of Accuracy of an Artificial Intelligence Algorithm to Detect Melanoma in Images of Skin Lesions <sup>13</sup>                                                              | 31617929 | 2019     | 7 United Kingdom hospitals                                                                           | External Validation                                                           | 289 (Fine tuning)<br>1550 (External validation ) | 514                | Dermoscopic             | Melanoma, dysplastic nevi, other    | 551 biopsied: 125 (22.7%) melanomas, 148 (26.8%) dysplastic nevi, and 278 (50.5%) received other diagnoses<br>999 lesions: described as thought to be “clinically benign” | Y                               | Y<br>Type I: 61 (12.4%), Type II: 172 (34.9%), Type III: 184 (37.3%), Type IV: 62 (12.6%), Type V: 10 (2.0%), Type VI: 4 (0.8%), Missing: 8 (1.6%). | Y<br>White: 484 (96.8%)<br>Non-white: 16 (3.2%)<br>Missing: 1 (0.1%) | N                    | Y                                | Y<br>External validation only                           | Y                                                                                     | N                      |
| Association Between Surgical Skin Markings in Dermoscopic Images and Diagnostic Performance of a Deep Learning Convolutional Neural Network for Melanoma Recognition <sup>14</sup>     | 31411641 | 2019     | Department of Dermatology, University of Heidelberg                                                  | External Validation                                                           | 130                                              | Not specified      | Dermoscopic             | Benign nevi, melanoma               | Melanomas: pathology, Benign nevi: no change over 2 years                                                                                                                 | Y                               | N                                                                                                                                                   | N                                                                    | N                    | Y                                | Y<br>External validation only                           | N                                                                                     | N                      |
| Augmented Intelligence Dermatology: Deep Neural Networks Empower Medical Professionals in Diagnosing Skin Cancer and Predicting Treatment Options for 134 Skin Disorders <sup>15</sup> | 32243882 | 2020     | ASAN: Department of Dermatology at Asan Medical Center                                               | Train, Internal Validation                                                    | 120,780                                          | 20,765             | Clinical                | 174 disorders                       | Clinical diagnosis and/or pathology                                                                                                                                       | Cannot be determined            | N                                                                                                                                                   | Y<br>>99% Asian                                                      | N                    | Y                                | Y                                                       | Y                                                                                     | Y<br>modelderm.com     |
|                                                                                                                                                                                        |          |          | Normal: scraped from the internet and lesions                                                        | Train, Internal Validation                                                    | 48,271                                           | 5,849              | Clinical                | Normal skin or nonspecific findings | Consensus panel of dermatologists                                                                                                                                         | Y                               | N                                                                                                                                                   | Y<br>>99% Asian                                                      | N                    | Y                                | Y                                                       | Y                                                                                     | Y                      |



| Title                                                                                                      | PMID     | Pub Year | Dataset Sources                                                                                                                                                      | Use of Dataset (Train, Internal Validation, Test, and/or External Validation) | Number of images used | Number of patients | Clinical or Dermoscopic | Diseases                                                         | Label                               | Gold Standard? (Y/N) | Fitzpatrick skin type description and breakdown (Y/N) | Ethnicity or race description and breakdown (Y/N) | Data Available (Y/N)                                | Image processing described (Y/N) | External test set used for statistical reporting? (Y/N) | Data evaluated in intended use setting by dermatologist (Reader study include)? (Y/N) | Model Available? (Y/N) |
|------------------------------------------------------------------------------------------------------------|----------|----------|----------------------------------------------------------------------------------------------------------------------------------------------------------------------|-------------------------------------------------------------------------------|-----------------------|--------------------|-------------------------|------------------------------------------------------------------|-------------------------------------|----------------------|-------------------------------------------------------|---------------------------------------------------|-----------------------------------------------------|----------------------------------|---------------------------------------------------------|---------------------------------------------------------------------------------------|------------------------|
|                                                                                                            |          |          | cropped out from ASAN                                                                                                                                                |                                                                               |                       |                    |                         |                                                                  |                                     |                      |                                                       |                                                   |                                                     |                                  |                                                         |                                                                                       |                        |
|                                                                                                            |          |          | MED-NODE: University Medical Center Groningen                                                                                                                        | Train, Internal Validation                                                    | 170                   | Not specified      | Clinical                | Melanoma vs nevus                                                | Pathology                           | Y                    | N                                                     | Y<br>Mainly Caucasian                             | Y                                                   | Y                                |                                                         |                                                                                       |                        |
|                                                                                                            |          |          | Web: scraped from the internet                                                                                                                                       | Train, Internal Validation                                                    | 51,459                | Not specified      | Clinical                | 174 disorders                                                    | Consensus panel of dermatologists   | Cannot be determined | N                                                     | Y<br>Mainly Caucasian                             | N<br>specific web images not shared                 | Y                                |                                                         |                                                                                       |                        |
|                                                                                                            |          |          | Edinburgh Dermofit Image Library                                                                                                                                     | Test, External Validation                                                     | 1,300                 | Not specified      | Clinical                | 10 disorders                                                     | Pathology                           | Y                    | N                                                     | Y<br>Mainly Caucasian                             | Y<br>Commercially available                         | Y                                |                                                         |                                                                                       |                        |
|                                                                                                            |          |          | SNU dataset: Department of Dermatology at Seoul National University Bundang Hospital, Inje University Sanggye Paik Hospital, and Hallym University Dongtan Hospital. | Test, External Validation                                                     | 2,201                 | 1608               | Clinical                | 134 disorders                                                    | Clinical diagnosis and/or pathology | Cannot be determined | N                                                     | Y<br>>99% Asian                                   | Y<br>Partially shared, additional data upon request | Y                                |                                                         |                                                                                       |                        |
| Automated detection of erythema migrans and other confounding skin lesions via deep learning <sup>16</sup> | 30654165 | 2018     | Online images                                                                                                                                                        | Train, Internal Validation, Test                                              | 1,718                 | Not specified      | Clinical                | Erythema migrans, tinea corporis, herpes zoster, and normal skin | Labeled by a single dermatologist   | Y                    | N                                                     | N                                                 | N<br>Specific web images not shared                 | Y                                | Y                                                       | N<br>(only compared against convenience sample of 7 non-medically-trained humans)     | N                      |
|                                                                                                            |          |          | Mid-Atlantic region research participants                                                                                                                            | Test, External Validation                                                     | 116                   | 63                 | Clinical                | Erythema migrans                                                 | Clinical diagnosis in person        | Y                    | N                                                     | N                                                 | N                                                   | Y                                |                                                         |                                                                                       |                        |

| Title                                                                                                                         | PMID     | Pub Year | Dataset Sources                                                                                                                                                                                                                                                                                                                                                                                                                                                                   | Use of Dataset (Train, Internal Validation, Test, and/or External Validation) | Number of images used | Number of patients | Clinical or Dermoscopic | Diseases                                                                                                                                                                                                                | Label                                                         | Gold Standard? (Y/N) | Fitzpatrick skin type description and breakdown (Y/N) | Ethnicity or race description and breakdown (Y/N) | Data Available (Y/N) | Image processing described (Y/N) | External test set used for statistical reporting? (Y/N) | Data evaluated in intended use setting by dermatologist (Reader study include)? (Y/N) | Model Available? (Y/N) |  |
|-------------------------------------------------------------------------------------------------------------------------------|----------|----------|-----------------------------------------------------------------------------------------------------------------------------------------------------------------------------------------------------------------------------------------------------------------------------------------------------------------------------------------------------------------------------------------------------------------------------------------------------------------------------------|-------------------------------------------------------------------------------|-----------------------|--------------------|-------------------------|-------------------------------------------------------------------------------------------------------------------------------------------------------------------------------------------------------------------------|---------------------------------------------------------------|----------------------|-------------------------------------------------------|---------------------------------------------------|----------------------|----------------------------------|---------------------------------------------------------|---------------------------------------------------------------------------------------|------------------------|--|
| Classification of the Clinical Images for Benign and Malignant Cutaneous Tumors Using a Deep Learning Algorithm <sup>17</sup> | 29428356 | 2018     | Asan: Department of Dermatology at Asan Medical Center                                                                                                                                                                                                                                                                                                                                                                                                                            | Train, Internal Validation, Test                                              | 17,125                | 4,867              | Clinical                | Basal cell carcinoma, squamous cell carcinoma, intraepithelial carcinoma, actinic keratosis, seborrheic keratosis, malignant melanoma, melanocytic nevus, lentigo, pyogenic granuloma, hemangioma, dermatofibroma, wart | 12,656 pathology confirmed, others by clinical diagnosis code | Cannot be determined | N                                                     | Y<br>>99% Asian                                   | N                    | Y                                | Y                                                       | N                                                                                     | Y                      |  |
|                                                                                                                               |          |          | Additional Asan                                                                                                                                                                                                                                                                                                                                                                                                                                                                   | Train, Internal Validation                                                    | 159,477               | 17,888             | Clinical                | 248 diseases                                                                                                                                                                                                            | Pathology if available, otherwise clinical diagnosis code     | Cannot be determined | N                                                     | Y<br>>99% Asian                                   | N                    |                                  |                                                         |                                                                                       |                        |  |
|                                                                                                                               |          |          | Atlas: multiple dermatology online atlases:<br><br>D@nderm Atlas of Clinical Dermatology ( <a href="http://www.dandermpdv.is.kkh.dk/atlas/index.html">http://www.dandermpdv.is.kkh.dk/atlas/index.html</a> )<br><br>Dermquest ( <a href="http://dermquest.com">http://dermquest.com</a> )<br><br>Interactive Derm Atlas ( <a href="http://www.dermatlas.net">http://www.dermatlas.net</a> )<br><br>DermIS ( <a href="https://www.dermis.net/der">https://www.dermis.net/der</a> ) | Train, Internal Validation                                                    | 3,820                 | Not specified      | Clinical                | Basal cell carcinoma, seborrheic keratosis, malignant melanoma, melanocytic nevus, lentigo, wart                                                                                                                        | Not specified                                                 | Cannot be determined | N                                                     | N                                                 | Y                    |                                  |                                                         |                                                                                       |                        |  |

| Title | PMID | Pub Year | Dataset Sources                                                                                                                                                                                                                                                                                                                                                                                                                                                                                                                                                                                                                                                                 | Use of Dataset (Train, Internal Validation, Test, and/or External Validation) | Number of images used | Number of patients | Clinical or Dermoscopic | Diseases             | Label     | Gold Standard? (Y/N) | Fitzpatrick skin type description and breakdown (Y/N) | Ethnicity or race description and breakdown (Y/N) | Data Available (Y/N) | Image processing described (Y/N) | External test set used for statistical reporting? (Y/N) | Data evaluated in intended use setting by dermatologist (Reader study include)? (Y/N) | Model Available? (Y/N) |  |
|-------|------|----------|---------------------------------------------------------------------------------------------------------------------------------------------------------------------------------------------------------------------------------------------------------------------------------------------------------------------------------------------------------------------------------------------------------------------------------------------------------------------------------------------------------------------------------------------------------------------------------------------------------------------------------------------------------------------------------|-------------------------------------------------------------------------------|-----------------------|--------------------|-------------------------|----------------------|-----------|----------------------|-------------------------------------------------------|---------------------------------------------------|----------------------|----------------------------------|---------------------------------------------------------|---------------------------------------------------------------------------------------|------------------------|--|
|       |      |          | <a href="http://misroot/en/home/index.htm">misroot/en/home/index.htm</a><br><br>Loyola University Dermatology Medical Education Website ( <a href="http://www.meddean.luc.edu/lumen/MedEd/medicine/dermatology/melton/atlas.htm">http://www.meddean.luc.edu/lumen/MedEd/medicine/dermatology/melton/atlas.htm</a> )<br><br>Dermatoweb ( <a href="http://www.dermatoweb.net/">http://www.dermatoweb.net/</a> )<br><br>Dermatology Atlas ( <a href="http://www.atlasdermatologico.com.br/">http://www.atlasdermatologico.com.br/</a> )<br><br>Hellenic Derm Atlas ( <a href="http://www.hellenicdermatlas.com/en/?params=en">http://www.hellenicdermatlas.com/en/?params=en</a> ) |                                                                               |                       |                    |                         |                      |           |                      |                                                       |                                                   |                      |                                  |                                                         |                                                                                       |                        |  |
|       |      |          | MED-NODE: University Medical Center Groningen                                                                                                                                                                                                                                                                                                                                                                                                                                                                                                                                                                                                                                   | Train, Internal Validation                                                    | 170                   | Not specified      | Clinical                | Melanoma vs nevus    | Pathology | Y                    | N                                                     | Y<br>Mainly Caucasian                             | Y                    |                                  |                                                         |                                                                                       |                        |  |
|       |      |          | Hallym dataset: Dongtan Sacred Heart Hospital,                                                                                                                                                                                                                                                                                                                                                                                                                                                                                                                                                                                                                                  | Test, External Validation                                                     | 152                   | 106                | Clinical                | Basal cell carcinoma | Pathology |                      | Not specified                                         | 104 Asian<br>2 Caucasian                          | N                    |                                  |                                                         |                                                                                       |                        |  |

| Title                                                                                                                                   | PMID     | Pub Year | Dataset Sources                                               | Use of Dataset (Train, Internal Validation, Test, and/or External Validation) | Number of images used | Number of patients | Clinical or Dermoscopic | Diseases                                                                                                                                                                                                 | Label                                              | Gold Standard? (Y/N) | Fitzpatrick skin type description and breakdown (Y/N) | Ethnicity or race description and breakdown (Y/N) | Data Available (Y/N)                        | Image processing described (Y/N) | External test set used for statistical reporting? (Y/N) | Data evaluated in intended use setting by dermatologist (Reader study include)? (Y/N) | Model Available? (Y/N) |
|-----------------------------------------------------------------------------------------------------------------------------------------|----------|----------|---------------------------------------------------------------|-------------------------------------------------------------------------------|-----------------------|--------------------|-------------------------|----------------------------------------------------------------------------------------------------------------------------------------------------------------------------------------------------------|----------------------------------------------------|----------------------|-------------------------------------------------------|---------------------------------------------------|---------------------------------------------|----------------------------------|---------------------------------------------------------|---------------------------------------------------------------------------------------|------------------------|
|                                                                                                                                         |          |          | Hallym University, and Sanggye Paik Hospital, Inje University |                                                                               |                       |                    |                         |                                                                                                                                                                                                          |                                                    |                      |                                                       |                                                   |                                             |                                  |                                                         |                                                                                       |                        |
|                                                                                                                                         |          |          | Edinburgh dataset: Edinburgh Dermofit Image Library           | Test, External Validation                                                     | 1,300                 | Not specified      | Clinical                | Basal cell carcinoma, squamous cell carcinoma, intraepithelial carcinoma, actinic keratosis, seborrheic keratosis, malignant melanoma, melanocytic nevus, pyogenic granuloma, hemangioma, dermatofibroma | Pathology                                          | Y                    | N                                                     | Y<br>Mainly Caucasian                             | Y<br>Commercially available                 |                                  |                                                         |                                                                                       |                        |
| Clinically Applicable Deep Learning Framework for Measurement of the Extent of Hair Loss in Patients With Alopecia Areata <sup>18</sup> | 32785607 | 2020     | Yonsei University Wonju Severance Christian Hospital          | Train, Internal Validation, Test                                              | 2,716                 | 679                | Clinical                | Alopecia areata                                                                                                                                                                                          | Pixel annotations by board certified dermatologist | Y                    | N                                                     | N                                                 | Y<br>Partial: masks but not clinical images | Y                                | N                                                       | Y                                                                                     | Y                      |
|                                                                                                                                         |          |          | Yonsei University Wonju Severance Christian Hospital          | Test                                                                          | 400                   | 100                | Clinical                |                                                                                                                                                                                                          | Pixel annotations by board certified dermatologist | Y                    | N                                                     | N                                                 | Y<br>Partial: masks but not clinical images | Y                                |                                                         |                                                                                       |                        |
| Clinically Relevant Vulnerabilities of Deep Machine Learning Systems for Skin Cancer Diagnosis <sup>19</sup>                            | 32931808 | 2020     | International Skin Imaging Collaboration dataset 2018         | Train, Internal Validation, Test                                              | 23,010                | Not specified      | Dermoscopic             | Melanoma, benign nevi                                                                                                                                                                                    | Not specified                                      | Cannot be determined | N                                                     | N                                                 | Y                                           | Y                                | N                                                       | N                                                                                     | Y                      |

| Title                                                                                                                                                                                      | PMID     | Pub Year | Dataset Sources                                                                                                                                                                                                                                                         | Use of Dataset (Train, Internal Validation, Test, and/or External Validation) | Number of images used | Number of patients | Clinical or Dermoscopic | Diseases                                                                                                                                                                                                                                                                        | Label                                                                                                                                                                                                            | Gold Standard? (Y/N) | Fitzpatrick skin type description and breakdown (Y/N) | Ethnicity or race description and breakdown (Y/N) | Data Available (Y/N) | Image processing described (Y/N) | External test set used for statistical reporting? (Y/N) | Data evaluated in intended use setting by dermatologist (Reader study include)? (Y/N) | Model Available? (Y/N) |
|--------------------------------------------------------------------------------------------------------------------------------------------------------------------------------------------|----------|----------|-------------------------------------------------------------------------------------------------------------------------------------------------------------------------------------------------------------------------------------------------------------------------|-------------------------------------------------------------------------------|-----------------------|--------------------|-------------------------|---------------------------------------------------------------------------------------------------------------------------------------------------------------------------------------------------------------------------------------------------------------------------------|------------------------------------------------------------------------------------------------------------------------------------------------------------------------------------------------------------------|----------------------|-------------------------------------------------------|---------------------------------------------------|----------------------|----------------------------------|---------------------------------------------------------|---------------------------------------------------------------------------------------|------------------------|
| Comparison of the accuracy of human readers versus machine-learning algorithms for pigmented skin lesion classification: an open, web-based, international, diagnostic study <sup>20</sup> | 31201137 | 2019     | ISIC 2018 challenge train and test: Vienna Dermatologic Imaging Research Group (ViDIR) at the Department of Dermatology at the Medical University of Vienna (Vienna, Austria), and the skin cancer practice of Cliff Rosendahl in Queensland (Capalaba, QLD, Australia) | Train, Internal Validation, Test                                              | 11,210                | Not specified      | Dermoscopic             | Intraepithelial carcinoma including actinic keratoses and Bowen's disease, basal cell carcinoma, benign keratinocytic lesions including solar lentigo, seborrheic keratosis and lichen planus-like keratosis, dermatofibroma, melanoma, melanocytic nevus, and vascular lesions | Pathology: >50% of all lesions, biology (>1.5 years sequential dermoscopic imaging without changes), and expert consensus in some cases of common, straightforward, non-melanocytic cases that were not excised. | Cannot be determined | N                                                     | N                                                 | Y                    | N                                | Y<br><br>Mix of test and external test                  | Y                                                                                     | N                      |
|                                                                                                                                                                                            |          |          | External test set: Turkey, New Zealand, Sweden, and Argentina                                                                                                                                                                                                           | External Validation                                                           | 316                   | Not specified      | Dermoscopic             | Not specified                                                                                                                                                                                                                                                                   | Not specified                                                                                                                                                                                                    | Cannot be determined | N                                                     | N                                                 | N                    | N                                |                                                         |                                                                                       |                        |
| Computer algorithms show potential for improving dermatologists' accuracy to diagnose cutaneous melanoma: Results of the International Skin Imaging Collaboration 2017 <sup>21</sup>       | 31306724 | 2020     | ISIC 2017 challenge test                                                                                                                                                                                                                                                | Test                                                                          | 150                   | Not specified      | Dermoscopic             | Melanomas (50), Benign nevi (50), and seborrheic keratosis (50)                                                                                                                                                                                                                 | Not specified                                                                                                                                                                                                    | Cannot be determined | N                                                     | N                                                 | N                    | N                                | N                                                       | Y                                                                                     | N                      |

| Title                                                                                                                               | PMID     | Pub Year     | Dataset Sources                                                                 | Use of Dataset (Train, Internal Validation, Test, and/or External Validation) | Number of images used | Number of patients | Clinical or Dermoscopic | Diseases                                                                | Label                                                                                                                                                                                                                                 | Gold Standard? (Y/N) | Fitzpatrick skin type description and breakdown (Y/N) | Ethnicity or race description and breakdown (Y/N) | Data Available (Y/N)                     | Image processing described (Y/N) | External test set used for statistical reporting? (Y/N) | Data evaluated in intended use setting by dermatologist (Reader study include)? (Y/N) | Model Available? (Y/N) |
|-------------------------------------------------------------------------------------------------------------------------------------|----------|--------------|---------------------------------------------------------------------------------|-------------------------------------------------------------------------------|-----------------------|--------------------|-------------------------|-------------------------------------------------------------------------|---------------------------------------------------------------------------------------------------------------------------------------------------------------------------------------------------------------------------------------|----------------------|-------------------------------------------------------|---------------------------------------------------|------------------------------------------|----------------------------------|---------------------------------------------------------|---------------------------------------------------------------------------------------|------------------------|
| Data augmentation in dermatology image recognition using machine learning <sup>22</sup>                                             | 31140653 | 2019         | DermNet NZ, Dermatology Atlas, Hellenic Dermatological Atlas, and Google Images | Train, Internal Validation, Test                                              | 1088                  | Not specified      | Clinical                | Acne, atopic dermatitis, impetigo, psoriasis, and rosacea               | Not specified                                                                                                                                                                                                                         | Cannot be determined | Not Specified                                         | Not specified                                     | Y (partial, Google images not indicated) | Y                                | N                                                       | N                                                                                     | N                      |
| Deep learning-based classification of facial dermatological disorders <sup>23</sup>                                                 | 33221639 | 2020<br>Epub | DermNet NZ, DermQuest, DermWeb, and Dermatoweb                                  | Train, Internal Validation, Test                                              | 505                   | Not specified      | Clinical                | Acne vulgaris, psoriasis, hemangioma, seborrheic dermatitis and rosacea | Not specified                                                                                                                                                                                                                         | Cannot be determined | N                                                     | N                                                 | Y                                        | Y                                | N                                                       | N                                                                                     | N                      |
| Deep Learning for Diagnostic Binary Classification of Multiple-Lesion Skin Disease <sup>24</sup>                                    | 33072786 | 2020         | Department of Dermatology, Aarhus University Hospital (AUH), Denmark            | Train, Internal Validation, Test                                              | 16,543                | 2,342              | Clinical                | Acne, rosacea, psoriasis, eczema, and cutaneous t-cell lymphoma         | Diagnosed by trained dermatologists according to ICD-10 codes                                                                                                                                                                         | Cannot be determined | Y<br>Fitzpatrick skin type II and III                 | Y<br>Danish                                       | N                                        | Y                                | N                                                       | N                                                                                     | Y                      |
| Deep learning outperformed 136 of 157 dermatologists in a head-to-head dermoscopic melanoma image classification task <sup>25</sup> | 30981091 | 2019         | ISIC Archive                                                                    | Train, Internal Validation, Test                                              | 13,737                | Not specified      | Dermoscopic             | Atypical nevi (18,566) and melanoma (2,169)                             | Melanomas: histopathological evaluation of biopsies. Nevi: either by histopathological examination (~24%), expert consensus (~54%) or by another diagnosis method, such as a series of images that showed no temporal changes (~22%). | Y                    | N                                                     | N                                                 | Y                                        | N                                | N                                                       | Y                                                                                     | N                      |
| Deep learning-based, computer-aided classifier developed with dermoscopic images shows comparable performance to 164                | 32826613 | 2020         | Dataset I: Department of Dermatology, Peking Union Medical College Hospital     | Train, Internal Validation, Test                                              | 7,262                 | 1,554              | Dermoscopic             | Basal cell carcinoma, melanocytic nevus, seborrheic keratosis, others   | Basal cell carcinoma confirmed by pathology. Others by expert consensus                                                                                                                                                               | Y                    | Y<br>Type IV                                          | Y<br>Asian                                        | N                                        | Y                                | N                                                       | Y                                                                                     | N                      |

| Title                                                                                                                              | PMID     | Pub Year | Dataset Sources                                                              | Use of Dataset (Train, Internal Validation, Test, and/or External Validation) | Number of images used | Number of patients | Clinical or Dermoscopic | Diseases                                                                                                                                                         | Label                                                                                                                                                                                                                                                    | Gold Standard? (Y/N)                                                                                                                                                               | Fitzpatrick skin type description and breakdown (Y/N) | Ethnicity or race description and breakdown (Y/N)                                                                                                                                                     | Data Available (Y/N) | Image processing described (Y/N) | External test set used for statistical reporting? (Y/N) | Data evaluated in intended use setting by dermatologist (Reader study include)? (Y/N) | Model Available? (Y/N) |
|------------------------------------------------------------------------------------------------------------------------------------|----------|----------|------------------------------------------------------------------------------|-------------------------------------------------------------------------------|-----------------------|--------------------|-------------------------|------------------------------------------------------------------------------------------------------------------------------------------------------------------|----------------------------------------------------------------------------------------------------------------------------------------------------------------------------------------------------------------------------------------------------------|------------------------------------------------------------------------------------------------------------------------------------------------------------------------------------|-------------------------------------------------------|-------------------------------------------------------------------------------------------------------------------------------------------------------------------------------------------------------|----------------------|----------------------------------|---------------------------------------------------------|---------------------------------------------------------------------------------------|------------------------|
| dermatologists in cutaneous disease diagnosis in the Chinese population <sup>26</sup>                                              |          |          | Dataset II: Department of Dermatology, Peking Union Medical College Hospital | Train, Internal Validation, Test                                              | 3,175                 | 561                | Dermoscopic             | Psoriasis, other inflammatory disorders                                                                                                                          | Expert consensus                                                                                                                                                                                                                                         | Y                                                                                                                                                                                  | Y<br>Type IV                                          | Y<br>Asian                                                                                                                                                                                            | N                    | Y                                |                                                         |                                                                                       |                        |
| Deep Neural Frameworks Improve the Accuracy of General Practitioners in the Classification of Pigmented Skin Lesions <sup>27</sup> | 33218060 | 2020     | HAM10000 dataset from ISIC                                                   | Train, Internal Validation, Test                                              | 10,015                | Not specified      | Dermoscopic             | Actinic keratosis, Intraepithelial carcinoma (Bowen's). Basal cell carcinoma, Benign keratosis, Dermatofibroma, Melanocytic nevi Vascular skin lesions, Melanoma | Actinic keratosis: consensus, Intraepithelial carcinoma, (Bowen's): pathology Basal cell carcinoma: pathology, Benign keratosis: consensus Dermatofibroma: consensus, Melanocytic nevi: consensus, Vascular skin lesions: consensus, Melanoma: consensus | Actinic keratosis: Y Intraepithelial carcinoma (Bowen's): Y Basal cell carcinoma: Y Benign keratosis: Y Dermatofibroma: Y Melanocytic nevi: Y Vascular skin lesions: Y Melanoma: Y | N                                                     | Y<br>Nationality breakdown (as a percentage of the 10,015 images in the dataset):<br>2.0% Portuguese (PH2)<br>22.6% Australian (Rosendahl)<br>Austrian (ViDIR)<br>Not specified (Atlas and ISIC 2017) | Y                    | N                                | N                                                       | N<br>(only against general practitioners)                                             | N                      |
| Deep neural networks are superior to dermatologists in                                                                             | 31401469 | 2019     | ISIC                                                                         | Train, Internal Validation                                                    | 4204                  | Not specified      | Dermoscopic             | Melanoma and nevi                                                                                                                                                | Pathologically confirmed                                                                                                                                                                                                                                 | Y                                                                                                                                                                                  | N                                                     | N                                                                                                                                                                                                     | Y                    | Y                                | N                                                       | Y                                                                                     | N                      |

| Title                                                                                                                                                                                                                                 | PMID     | Pub Year | Dataset Sources               | Use of Dataset (Train, Internal Validation, Test, and/or External Validation) | Number of images used | Number of patients | Clinical or Dermoscopic | Diseases                                                                               | Label                                                                                                                                                                                                                                                                                    | Gold Standard? (Y/N) | Fitzpatrick skin type description and breakdown (Y/N) | Ethnicity or race description and breakdown (Y/N) | Data Available (Y/N) | Image processing described (Y/N) | External test set used for statistical reporting? (Y/N) | Data evaluated in intended use setting by dermatologist (Reader study include)? (Y/N) | Model Available? (Y/N) |
|---------------------------------------------------------------------------------------------------------------------------------------------------------------------------------------------------------------------------------------|----------|----------|-------------------------------|-------------------------------------------------------------------------------|-----------------------|--------------------|-------------------------|----------------------------------------------------------------------------------------|------------------------------------------------------------------------------------------------------------------------------------------------------------------------------------------------------------------------------------------------------------------------------------------|----------------------|-------------------------------------------------------|---------------------------------------------------|----------------------|----------------------------------|---------------------------------------------------------|---------------------------------------------------------------------------------------|------------------------|
| melanoma image classification <sup>28</sup>                                                                                                                                                                                           |          |          | ISIC                          | Test                                                                          | 804                   | Not specified      | Dermoscopic             | Melanoma and nevi                                                                      | Pathologically confirmed                                                                                                                                                                                                                                                                 | Y                    | N                                                     | N                                                 | Y                    | Y                                |                                                         |                                                                                       |                        |
| Deep neural networks show an equivalent and often superior performance to dermatologists in onychomycosis diagnosis: Automatic construction of onychomycosis datasets by region-based convolutional deep neural network <sup>29</sup> | 29352285 | 2018     | Asan A1 – Asan Medical Center | Train, Internal Validation                                                    | 49567                 | 4557               | Clinical                | Onychomycosis, nail dystrophy, onycholysis, melanonychia, other nail disorders, normal | Diagnosis based on image by dermatologist and chart review                                                                                                                                                                                                                               | Y                    | N                                                     | N                                                 | Y                    | Y                                | Y                                                       | Y                                                                                     | Y                      |
|                                                                                                                                                                                                                                       |          |          | Asan A2 – Asan Medical Center | Train, Internal Validation                                                    | 3741                  | 484                | Clinical                | Onychomycosis, nail dystrophy, onycholysis, melanonychia                               | Clinical diagnosis in clinic and fungal culture in 64.7%                                                                                                                                                                                                                                 | Y                    | N                                                     | N                                                 | Y                    | Y                                |                                                         |                                                                                       |                        |
|                                                                                                                                                                                                                                       |          |          | Inje B1 – Inje University     | Test, External Validation                                                     | 100                   | 57                 | Clinical                | Onychomycosis and nail dystrophy                                                       | Onychomycosis – positive KOH or fungal culture or successful treatment with antifungals. Note that all Inje B1 had positive fungal culture. Nail dystrophy – negative KOH or fungal culture, unresponsiveness to antifungals, or responsiveness to triamcinolone intralesional injection | Y                    | N                                                     | N                                                 | Y                    | Y                                |                                                         |                                                                                       |                        |
|                                                                                                                                                                                                                                       |          |          | Inje B2 - Inje University     | Test, External Validation                                                     | 194                   | 61                 | Clinical                | Onychomycosis, nail dystrophy                                                          | Onychomycosis – positive KOH or fungal culture or successful treatment with antifungals. Nail dystrophy – negative KOH or fungal culture, unresponsiveness to antifungals, or responsiveness to triamcinolone                                                                            | Y                    | N                                                     | N                                                 | Y                    | Y                                |                                                         |                                                                                       |                        |



| Title                                                                                                                                                                           | PMID     | Pub Year | Dataset Sources                   | Use of Dataset (Train, Internal Validation, Test, and/or External Validation) | Number of images used | Number of patients | Clinical or Dermoscopic | Diseases                                                                                                                                                                | Label                                                                                                                                                                                                                                                                         | Gold Standard? (Y/N) | Fitzpatrick skin type description and breakdown (Y/N) | Ethnicity or race description and breakdown (Y/N) | Data Available (Y/N) | Image processing described (Y/N) | External test set used for statistical reporting? (Y/N) | Data evaluated in intended use setting by dermatologist (Reader study include)? (Y/N) | Model Available? (Y/N) |
|---------------------------------------------------------------------------------------------------------------------------------------------------------------------------------|----------|----------|-----------------------------------|-------------------------------------------------------------------------------|-----------------------|--------------------|-------------------------|-------------------------------------------------------------------------------------------------------------------------------------------------------------------------|-------------------------------------------------------------------------------------------------------------------------------------------------------------------------------------------------------------------------------------------------------------------------------|----------------------|-------------------------------------------------------|---------------------------------------------------|----------------------|----------------------------------|---------------------------------------------------------|---------------------------------------------------------------------------------------|------------------------|
|                                                                                                                                                                                 |          |          |                                   |                                                                               |                       |                    |                         |                                                                                                                                                                         | intralesional injection                                                                                                                                                                                                                                                       |                      |                                                       |                                                   |                      |                                  |                                                         |                                                                                       |                        |
|                                                                                                                                                                                 |          |          | Hallym – Hallym University        | Test, External Validation                                                     | 125                   | 25                 | Clinical                | Onychomycosis, nail dystrophy                                                                                                                                           | Onychomycosis – positive KOH or fungal culture or successful treatment with antifungals. Note all cases here were KOH confirmed. Nail dystrophy – negative KOH or fungal culture, unresponsiveness to antifungals, or responsiveness to triamcinolone intralesional injection | Y                    | N                                                     | N                                                 | Y                    | Y                                |                                                         |                                                                                       |                        |
|                                                                                                                                                                                 |          |          | Seoul – Seoul National University | Test, External Validation                                                     | 939                   | 169                | Clinical                | Onychomycosis, nail dystrophy                                                                                                                                           | Onychomycosis – positive KOH or fungal culture or successful treatment with antifungals. Note all cases here were KOH confirmed. Nail dystrophy – negative KOH or fungal culture, unresponsiveness to antifungals, or responsiveness to triamcinolone intralesional injection | Y                    | N                                                     | N                                                 | Y                    | Y                                |                                                         |                                                                                       |                        |
| Deep-learning-based, computer-aided classifier developed with a small dataset of clinical images surpasses board-certified dermatologists in skin tumor diagnosis <sup>30</sup> | 29953582 | 2018     | University of Tsukuba Hospital    | Train, Internal Validation, Test                                              | 6009                  | 2296               | Clinical                | Malignant melanoma (MM), squamous cell carcinoma (SCC), Bowen disease, actinic keratosis, basal cell carcinoma (BCC), naevus cell naevus (NCN), blue naevus, congenital | All of the diagnoses were based on pathological examination except for the cases of congenital melanocytic naevus, naevus spilus and lentigo simplex.                                                                                                                         | Y                    | N                                                     | Y<br>Asian                                        | N                    | Y                                | N                                                       | Y                                                                                     | N                      |

| Title                                                                                                                                                                              | PMID     | Pub Year | Dataset Sources                                                                                                                                   | Use of Dataset (Train, Internal Validation, Test, and/or External Validation) | Number of images used | Number of patients | Clinical or Dermoscopic  | Diseases                                                                                                                                                                                                                             | Label                                                                                                                                                                                                                                                                                                                                                                                             | Gold Standard? (Y/N) | Fitzpatrick skin type description and breakdown (Y/N) | Ethnicity or race description and breakdown (Y/N) | Data Available (Y/N)                                                        | Image processing described (Y/N) | External test set used for statistical reporting? (Y/N) | Data evaluated in intended use setting by dermatologist (Reader study include)? (Y/N) | Model Available? (Y/N) |
|------------------------------------------------------------------------------------------------------------------------------------------------------------------------------------|----------|----------|---------------------------------------------------------------------------------------------------------------------------------------------------|-------------------------------------------------------------------------------|-----------------------|--------------------|--------------------------|--------------------------------------------------------------------------------------------------------------------------------------------------------------------------------------------------------------------------------------|---------------------------------------------------------------------------------------------------------------------------------------------------------------------------------------------------------------------------------------------------------------------------------------------------------------------------------------------------------------------------------------------------|----------------------|-------------------------------------------------------|---------------------------------------------------|-----------------------------------------------------------------------------|----------------------------------|---------------------------------------------------------|---------------------------------------------------------------------------------------|------------------------|
|                                                                                                                                                                                    |          |          |                                                                                                                                                   |                                                                               |                       |                    |                          | melanocytic naevus, Spitz naevus, sebaceous naevus, poroma, seborrheic keratosis, naevus spilus and lentigo simplex                                                                                                                  |                                                                                                                                                                                                                                                                                                                                                                                                   |                      |                                                       |                                                   |                                                                             |                                  |                                                         |                                                                                       |                        |
| Dermatologist-level classification of skin cancer with deep neural networks <sup>31</sup>                                                                                          | 28117445 | 2017     | Open-access dermatology repositories, the ISIC Archive (dermoscopic images), the Edinburgh Dermofit Library, and data from the Stanford Hospital. | Train, Internal Validation, Test                                              | 129,450               | Not specified      | Clinical and Dermoscopic | Melanocytic lesions include malignant melanoma and benign nevi. Epidermal lesions include malignant basal and squamous cell carcinomas, intraepithelial carcinomas, pre-malignant actinic keratosis and benign seborrheic keratosis. | Images from the online open-access dermatology repositories are annotated by dermatologists, not necessarily through biopsy. The ISIC Archive data used are composed strictly of melanocytic lesions that are biopsy-proven and annotated as malignant or benign. The Edinburgh Dermofit Library and data from the Stanford Hospital are biopsy-proven and annotated by individual disease names. | Y                    | N                                                     | N                                                 | Y, partial - ISIC Archive and the Edinburgh Dermofit Library are available. | Y                                | N                                                       | Y                                                                                     | N                      |
| Dermoscopic diagnostic performance of Japanese dermatologists for skin tumors differs by patient origin: A deep learning convolutional neural network closes the gap <sup>32</sup> | 33063398 | 2020     | ISIC 2017 training/validation                                                                                                                     | Train, Internal Validation                                                    | 2092                  | Not specified      | Dermoscopic              | Malignant melanoma (MM), basal cell carcinoma (BCC), melanocytic nevus (MN), or benign keratosis (BK)                                                                                                                                | Benign nevi: expert consensus, Seborrheic keratosis: expert consensus, Melanoma: pathology                                                                                                                                                                                                                                                                                                        | Y                    | N                                                     | N                                                 | Y                                                                           | Y                                | N                                                       | Y                                                                                     | N                      |
|                                                                                                                                                                                    |          |          | HAM 10000 (ISIC)                                                                                                                                  | Train, Internal Validation, Test                                              | 7071                  | Not specified      | Dermoscopic              | including solar lentigo, seborrheic keratosis and lichen planus-like keratosis                                                                                                                                                       | Actinic keratosis: consensus, Intraepithelial carcinoma (Bowen's): pathology,                                                                                                                                                                                                                                                                                                                     | Y                    | N                                                     | N                                                 | Y                                                                           | Y                                |                                                         |                                                                                       |                        |

| Title                                                                                                                      | PMID     | Pub Year | Dataset Sources                                                  | Use of Dataset (Train, Internal Validation, Test, and/or External Validation) | Number of images used | Number of patients | Clinical or Dermoscopic | Diseases                    | Label                                                                                                                                                                      | Gold Standard? (Y/N) | Fitzpatrick skin type description and breakdown (Y/N) | Ethnicity or race description and breakdown (Y/N) | Data Available (Y/N) | Image processing described (Y/N) | External test set used for statistical reporting? (Y/N) | Data evaluated in intended use setting by dermatologist (Reader study include)? (Y/N)                                                                                                                   | Model Available? (Y/N) |                                                                                                                   |
|----------------------------------------------------------------------------------------------------------------------------|----------|----------|------------------------------------------------------------------|-------------------------------------------------------------------------------|-----------------------|--------------------|-------------------------|-----------------------------|----------------------------------------------------------------------------------------------------------------------------------------------------------------------------|----------------------|-------------------------------------------------------|---------------------------------------------------|----------------------|----------------------------------|---------------------------------------------------------|---------------------------------------------------------------------------------------------------------------------------------------------------------------------------------------------------------|------------------------|-------------------------------------------------------------------------------------------------------------------|
|                                                                                                                            |          |          |                                                                  |                                                                               |                       |                    |                         |                             | Basal cell carcinoma: pathology, Benign keratosis: consensus Dermatofibroma: consensus, Melanocytic nevi: consensus, Vascular skin lesions: consensus, Melanoma: consensus |                      |                                                       |                                                   |                      |                                  |                                                         |                                                                                                                                                                                                         |                        |                                                                                                                   |
|                                                                                                                            |          |          | BCN20000 (ISIC)                                                  | Train, Internal Validation                                                    | 3141                  | Not specified      | Dermoscopic             |                             | ISIC labels                                                                                                                                                                | Y                    | N                                                     | N                                                 | Y                    | Y                                |                                                         |                                                                                                                                                                                                         |                        |                                                                                                                   |
|                                                                                                                            |          |          | Shinshu Department of Dermatology at Shinshu University Hospital | Train, Internal Validation, Test                                              | 644                   | Not specified      | Dermoscopic             |                             | Histopathology and/or definite clinical course along with the consensus of three dermoscopy experts                                                                        | Y                    | N                                                     | Japanese                                          | No                   | Yes                              |                                                         |                                                                                                                                                                                                         |                        |                                                                                                                   |
|                                                                                                                            |          |          | ISIC 2017 (test set)                                             | Test                                                                          | 600                   | Not specified      | Dermoscopic             |                             | Benign nevi: expert consensus, Seborrheic keratosis: expert consensus, Melanoma: pathology                                                                                 | Y                    | N                                                     | N                                                 | Y                    | Y                                |                                                         |                                                                                                                                                                                                         |                        |                                                                                                                   |
| Detection of Malignant Melanoma Using Artificial Intelligence: An Observational Study of Diagnostic Accuracy <sup>33</sup> | 31921498 |          | PH2                                                              | Train, Internal Validation, Test                                              | 6430                  | Not specified      | Dermoscopic             | Melanoma, benign, nonbenign | Melanoma: histopathology, Benign: not specified. Nonbenign: not specified<br><br>(paper does not specify by dataset but indicates the 3 labels above)                      | Y                    | N                                                     | N                                                 | Y                    | N                                | N                                                       | (states that the model was “trained and validated against a dataset of archived dermoscopic images of skin lesions” but does not specify whether there is or is not any overlap with the test datasets) | N                      | Y<br><br>(DERM is owned by Skin Analytics, whose services are only available through clinical partners in the UK) |
|                                                                                                                            |          |          | Interactive Atlas of Dermoscopy published by EDRA,               | Train, Internal Validation, Test                                              |                       | Not specified      |                         |                             |                                                                                                                                                                            |                      | N                                                     | N                                                 | Y                    | N                                |                                                         |                                                                                                                                                                                                         |                        |                                                                                                                   |
|                                                                                                                            |          |          | ISIC Archive                                                     | Train, Internal Validation, Test                                              |                       | Not specified      |                         |                             |                                                                                                                                                                            |                      | N                                                     | N                                                 | Y                    | N                                |                                                         |                                                                                                                                                                                                         |                        |                                                                                                                   |
|                                                                                                                            |          |          | “a variety of other sources”                                     | Train, Internal Validation, Test                                              | 672                   | Not specified      |                         |                             |                                                                                                                                                                            |                      | N                                                     | N                                                 | N                    | N                                |                                                         |                                                                                                                                                                                                         |                        |                                                                                                                   |

| Title                                                                                                                               | PMID     | Pub Year | Dataset Sources                                                             | Use of Dataset (Train, Internal Validation, Test, and/or External Validation) | Number of images used | Number of patients | Clinical or Dermoscopic | Diseases                                                                                                                                                          | Label                                                                                                                                                                                                                                                     | Gold Standard? (Y/N)                                                                                                                                                                                         | Fitzpatrick skin type description and breakdown (Y/N) | Ethnicity or race description and breakdown (Y/N)                                                                       | Data Available (Y/N) | Image processing described (Y/N) | External test set used for statistical reporting? (Y/N) | Data evaluated in intended use setting by dermatologist (Reader study include)? (Y/N) | Model Available? (Y/N) |
|-------------------------------------------------------------------------------------------------------------------------------------|----------|----------|-----------------------------------------------------------------------------|-------------------------------------------------------------------------------|-----------------------|--------------------|-------------------------|-------------------------------------------------------------------------------------------------------------------------------------------------------------------|-----------------------------------------------------------------------------------------------------------------------------------------------------------------------------------------------------------------------------------------------------------|--------------------------------------------------------------------------------------------------------------------------------------------------------------------------------------------------------------|-------------------------------------------------------|-------------------------------------------------------------------------------------------------------------------------|----------------------|----------------------------------|---------------------------------------------------------|---------------------------------------------------------------------------------------|------------------------|
| Development and accuracy of an artificial intelligence algorithm for acne grading from smartphone photographs <sup>34</sup>         | 31446631 | 2019     | Acne dataset collected from France, South Africa, China, India              | Train, Internal Validation, Test                                              | 5,972                 | 1,072              | Clinical                | Acne                                                                                                                                                              | Three trained dermatologists with expertise in acne graded each patient's acne severity using the European GEA scale based on 3 image views. For each patient, the final GEA grade chosen was that confirmed by at least 2 out of the 3 dermatologists    | Y                                                                                                                                                                                                            | N                                                     | N<br>Describes distinct ethnicities (Caucasian, African, Asian, Latin, Indian) but does not give breakdown by ethnicity | N                    | Y                                | N                                                       | N                                                                                     | N                      |
| Development and validation of two artificial intelligence models for diagnosing benign, pigmented facial skin lesions <sup>35</sup> | 32772400 | 2020     | Hospital for Skin Diseases at the Chinese Academy of Medical Science        | Train, Internal Validation, Test                                              | 12,816                | Not specified      | Clinical                | Acquired nevi of Ota, melasmas, café-au-lait spots, freckles, seborrheic keratoses, nevi of Ota, other                                                            | Complete consensus among 3 dermatologists with >3 years' experience                                                                                                                                                                                       | Y                                                                                                                                                                                                            | N                                                     | N                                                                                                                       | N                    | Y                                | N                                                       | N                                                                                     | N                      |
| Development of a lightweight deep learning model for cloud applications and remote diagnosis of skin cancers <sup>36</sup>          | 33211346 | 2020     | Department of Dermatology, Kaohsiung Chang Gung Memorial Hospital in Taiwan | Train, Internal Validation, Test                                              | 1,287                 | 1,222              | Clinical                | Basal cell carcinoma, benign keratosis-like lesions, melanoma, melanocytic nevi                                                                                   | Pathology                                                                                                                                                                                                                                                 | Y                                                                                                                                                                                                            | N                                                     | N                                                                                                                       | N                    | Y                                | N                                                       | N                                                                                     | N                      |
|                                                                                                                                     |          |          | HAM10000 (ISIC 2018 Train)                                                  | Train, Internal Validation, Test                                              | 10,015                | Not specified      | Dermoscopic             | Actinic keratosis, Intraepithelial carcinoma (Bowen's), Basal cell carcinoma, Benign keratosis, Dermatofibroma, Melanocytic nevi, Vascular skin lesions, Melanoma | Actinic keratosis: consensus, Intraepithelial carcinoma (Bowen's): pathology, Basal cell carcinoma: pathology, Benign keratosis: consensus, Dermatofibroma: consensus. Melanocytic nevi: consensus. Vascular skin lesions: consensus. Melanoma: consensus | Y<br>Actinic keratosis: Y<br>Intraepithelial carcinoma (Bowen's): Y<br>Basal cell carcinoma: Y<br>Benign keratosis: Y<br>Dermatofibroma: Y<br>Melanocytic nevi: Y<br>Vascular skin lesions: Y<br>Melanoma: Y | N                                                     | N                                                                                                                       | Y                    | Y                                | N                                                       | N                                                                                     |                        |

| Title                                                                                                            | PMID     | Pub Year | Dataset Sources                                    | Use of Dataset (Train, Internal Validation, Test, and/or External Validation) | Number of images used | Number of patients | Clinical or Dermoscopic | Diseases                                                                                                                                                                                                                                                                                                                                                                                                                                                                             | Label                                                                                       | Gold Standard? (Y/N)                               | Fitzpatrick skin type description and breakdown (Y/N) | Ethnicity or race description and breakdown (Y/N) | Data Available (Y/N) | Image processing described (Y/N) | External test set used for statistical reporting? (Y/N) | Data evaluated in intended use setting by dermatologist (Reader study include)? (Y/N) | Model Available? (Y/N)                                                                                          |   |
|------------------------------------------------------------------------------------------------------------------|----------|----------|----------------------------------------------------|-------------------------------------------------------------------------------|-----------------------|--------------------|-------------------------|--------------------------------------------------------------------------------------------------------------------------------------------------------------------------------------------------------------------------------------------------------------------------------------------------------------------------------------------------------------------------------------------------------------------------------------------------------------------------------------|---------------------------------------------------------------------------------------------|----------------------------------------------------|-------------------------------------------------------|---------------------------------------------------|----------------------|----------------------------------|---------------------------------------------------------|---------------------------------------------------------------------------------------|-----------------------------------------------------------------------------------------------------------------|---|
| Diagnostic accuracy of content-based dermoscopic image retrieval with deep classification features <sup>37</sup> | 30207594 | 2018     | EDRA, companion to Interactive Atlas of Dermoscopy | Train, Internal Validation, Test, External Test                               | 888                   | Not specified      | Dermoscopic             | Benign keratinocytic lesions (seborrheic keratoses, solar lentigines and lichen planus-like keratoses), melanoma, nevus                                                                                                                                                                                                                                                                                                                                                              | Not specified                                                                               | Cannot be determined                               | N                                                     | N                                                 | Y                    | Y                                | Y                                                       | N                                                                                     | Trained three models based on each dataset and tested on both data in the dataset and data from other datasets. | N |
|                                                                                                                  |          |          | ISIC 2017                                          | Train, Internal Validation, Test, External Test                               | 2750                  | Not specified      | Dermoscopic             | Benign nevi, seborrheic keratosis, melanoma                                                                                                                                                                                                                                                                                                                                                                                                                                          | Benign nevi: expert consensus, Seborrheic keratosis: expert consensus, Melanoma: pathology, | Nevus: Y<br>Seborrheic keratosis: Y<br>Melanoma: Y | N                                                     | N                                                 | Y                    |                                  |                                                         |                                                                                       |                                                                                                                 |   |
|                                                                                                                  |          |          | PRIV                                               | Train, Internal Validation, Test, External Test                               | 16,691                | Not specified      | Dermoscopic             | Angioma (including angiokeratoma), BCC (basal cell carcinoma), benign keratinocytic lesions (seborrheic keratoses, solar lentigines and lichen planus-like keratoses, dermatofibromas, inflammatory lesions (including dermatitis, lichen sclerosus, porokeratosis, rosacea, psoriasis, lupus erythematosus, bullous pemphigoid, lichen planus, granulomatous processes and artefacts), melanoma (all types), nevus (all types of melanocytic naevi), SCC (squamous cell carcinomas, | Pathology and clinical diagnosis                                                            | Cannot be determined                               | N                                                     | N                                                 | N                    |                                  |                                                         |                                                                                       |                                                                                                                 |   |

| Title                                                                                                                                       | PMID     | Pub Year | Dataset Sources                                                                                                                                                   | Use of Dataset (Train, Internal Validation, Test, and/or External Validation) | Number of images used | Number of patients | Clinical or Dermoscopic  | Diseases                                                                                                                                                                                            | Label                                                                                                                                                                                                                                                          | Gold Standard? (Y/N) | Fitzpatrick skin type description and breakdown (Y/N) | Ethnicity or race description and breakdown (Y/N) | Data Available (Y/N) | Image processing described (Y/N) | External test set used for statistical reporting? (Y/N) | Data evaluated in intended use setting by dermatologist (Reader study include)? (Y/N) | Model Available? (Y/N)  |
|---------------------------------------------------------------------------------------------------------------------------------------------|----------|----------|-------------------------------------------------------------------------------------------------------------------------------------------------------------------|-------------------------------------------------------------------------------|-----------------------|--------------------|--------------------------|-----------------------------------------------------------------------------------------------------------------------------------------------------------------------------------------------------|----------------------------------------------------------------------------------------------------------------------------------------------------------------------------------------------------------------------------------------------------------------|----------------------|-------------------------------------------------------|---------------------------------------------------|----------------------|----------------------------------|---------------------------------------------------------|---------------------------------------------------------------------------------------|-------------------------|
|                                                                                                                                             |          |          |                                                                                                                                                                   |                                                                               |                       |                    |                          | actinic keratoses, Bowen's)                                                                                                                                                                         |                                                                                                                                                                                                                                                                |                      |                                                       |                                                   |                      |                                  |                                                         |                                                                                       |                         |
| Diagnostic capacity of skin tumor artificial intelligence-assisted decision-making software in real-world clinical settings <sup>38</sup>   | 32810047 | 2020     | Department of Dermatology of the China-Japan Friendship Hospital                                                                                                  | External Validation                                                           | 212                   | 106                | Clinical and dermoscopic | Melanoma, SCC, BCC, AKs, nevus cell nevus, seborrheic keratosis, hemangioma, dermatofibroma, epidermoid cyst                                                                                        | All lesions were surgically excised and histopathologically proven                                                                                                                                                                                             | Y                    | N                                                     | N                                                 | N                    | N                                | Y<br>External validation                                | Y                                                                                     | Y<br>(Youzhi AI)        |
| Diagnostic performance of a deep learning convolutional neural network in the differentiation of combined naevi and melanomas <sup>39</sup> | 31856342 | 2019     | Collected from the departments of dermatology of the university medical centres of Heidelberg, Göttingen, and from the medical centre Thalkirchner Straße, Munich | External Validation                                                           | 72                    | 72                 | Dermoscopic              | Benign nevi, melanoma                                                                                                                                                                               | Melanomas (n = 36) – all histologically proven<br><br>Excised benign nevi (n=34) – histologically proven<br><br>In non-excised cases of benign naevi (n = 2), the diagnosis was based on expert consensus and an unremarkable follow-up over at least 2 years. | Y                    | N                                                     | N                                                 | N                    | N                                | Y<br>External validation                                | Y                                                                                     | Yes<br>Moleanalyzer-Pro |
| Diagnostic performance of the MelaFind device in a real-life clinical setting <sup>40</sup>                                                 | 28332777 | 2017     | Dermatology patients within a single clinical practice                                                                                                            | External Validation                                                           | 360                   | 111                | Dermoscopic              | Melanomas and nevi. Targeted: pigmented skin lesions with one or more clinical (e. g. variegated color, border irregularity, eccentric hyperpigmentation, or asymmetry) or historical (e. g. recent | 113 were excised for histological diagnosis (based on MelaFind score or physician discretion). The rest were followed clinically.                                                                                                                              | Cannot be determined | N                                                     | N                                                 | N                    | N                                | Y<br>External validation only                           | N                                                                                     | Y<br>(MelaFind)         |

| Title                                                                                                                                | PMID     | Pub Year | Dataset Sources                         | Use of Dataset (Train, Internal Validation, Test, and/or External Validation) | Number of images used | Number of patients | Clinical or Dermoscopic | Diseases                                                                                                                                                          | Label                                                                                                                                                                                                                                                    | Gold Standard? (Y/N)                                                                                                                                                               | Fitzpatrick skin type description and breakdown (Y/N) | Ethnicity or race description and breakdown (Y/N)                                                                                                                                                             | Data Available (Y/N) | Image processing described (Y/N) | External test set used for statistical reporting? (Y/N) | Data evaluated in intended use setting by dermatologist (Reader study include)? (Y/N) | Model Available? (Y/N) |
|--------------------------------------------------------------------------------------------------------------------------------------|----------|----------|-----------------------------------------|-------------------------------------------------------------------------------|-----------------------|--------------------|-------------------------|-------------------------------------------------------------------------------------------------------------------------------------------------------------------|----------------------------------------------------------------------------------------------------------------------------------------------------------------------------------------------------------------------------------------------------------|------------------------------------------------------------------------------------------------------------------------------------------------------------------------------------|-------------------------------------------------------|---------------------------------------------------------------------------------------------------------------------------------------------------------------------------------------------------------------|----------------------|----------------------------------|---------------------------------------------------------|---------------------------------------------------------------------------------------|------------------------|
|                                                                                                                                      |          |          |                                         |                                                                               |                       |                    |                         | enlargement, recent change in color) characteristics of melanoma                                                                                                  |                                                                                                                                                                                                                                                          |                                                                                                                                                                                    |                                                       |                                                                                                                                                                                                               |                      |                                  |                                                         |                                                                                       |                        |
| Effects of Label Noise on Deep Learning-Based Skin Cancer Classification <sup>41</sup>                                               | 32435646 | 2020     | HAM10000 (ISIC 2018 Train) ISIC Archive | Train, Internal Validation, Test                                              | 804                   | Not specified      | Dermoscopic             | Actinic keratosis, intraepithelial carcinoma (Bowen's), basal cell carcinoma, benign keratosis, dermatofibroma, melanocytic nevi, vascular skin lesions, melanoma | Actinic keratosis: consensus, Intraepithelial carcinoma (Bowen's): pathology, Basal cell carcinoma: pathology Benign keratosis: consensus, Dermatofibroma: consensus. Melanocytic nevi: consensus, Vascular skin lesions: consensus, Melanoma: consensus | Actinic keratosis: Y Intraepithelial carcinoma (Bowen's): Y Basal cell carcinoma: Y Benign keratosis: Y Dermatofibroma: Y Melanocytic nevi: Y Vascular skin lesions: Y Melanoma: Y | N                                                     | Y<br><br>Nationality breakdown (as a percentage of the 10,015 images in the dataset):<br><br>2.0% Portuguese (PH2)<br>22.6% Australian (Rosendahl)<br>Austrian (ViDIR)<br>Not specified (Atlas and ISIC 2017) | Y                    | N                                | N                                                       | N                                                                                     | N                      |
| Enhanced classifier training to improve precision of a convolutional neural network to identify images of skin lesions <sup>42</sup> | 31233565 | 2019     | ISIC Archive (dermoscopic images)       | Train, Internal Validation                                                    | 13,637                | Not specified      | Dermoscopic             | Melanomas and benign nevi                                                                                                                                         | Melanoma – biopsy proven<br><br>Nevi were made either by histopathological examinations (~24%), by expert consensus (~54%), or by another type                                                                                                           | Y                                                                                                                                                                                  | N                                                     | N                                                                                                                                                                                                             | Y                    | Y                                | N                                                       | N                                                                                     | N                      |

| Title                                                                                                      | PMID     | Pub Year | Dataset Sources                                                                    | Use of Dataset (Train, Internal Validation, Test, and/or External Validation) | Number of images used           | Number of patients | Clinical or Dermoscopic  | Diseases                                                                                                                                 | Label                                                                   | Gold Standard? (Y/N) | Fitzpatrick skin type description and breakdown (Y/N) | Ethnicity or race description and breakdown (Y/N) | Data Available (Y/N) | Image processing described (Y/N) | External test set used for statistical reporting? (Y/N) | Data evaluated in intended use setting by dermatologist (Reader study include)? (Y/N) | Model Available? (Y/N) |
|------------------------------------------------------------------------------------------------------------|----------|----------|------------------------------------------------------------------------------------|-------------------------------------------------------------------------------|---------------------------------|--------------------|--------------------------|------------------------------------------------------------------------------------------------------------------------------------------|-------------------------------------------------------------------------|----------------------|-------------------------------------------------------|---------------------------------------------------|----------------------|----------------------------------|---------------------------------------------------------|---------------------------------------------------------------------------------------|------------------------|
|                                                                                                            |          |          | International Symposium on Biomedical Imaging 2016 Challenge (ISIC 2016)           | Test                                                                          | 379                             | Not specified      | Dermoscopic              |                                                                                                                                          | of diagnosis such as a series of images with no change overtime (~22%). |                      | N                                                     | N                                                 | Y                    | Y                                |                                                         |                                                                                       |                        |
| Expert-Level Diagnosis of Nonpigmented Skin Cancer by Combined Convolutional Neural Networks <sup>43</sup> | 30484822 | 2019     | Clinical images from primary skin cancer clinic in Queensland, Australia           | Train                                                                         | 7895                            | Not specified      | Clinical                 | Actinic keratoses and intraepithelial carcinoma (Bowen's), basal cell carcinoma (all subtypes), benign keratosis-like lesions (including | Pathology                                                               | Y                    | N                                                     | N                                                 | N                    | Y                                | Y                                                       | Y                                                                                     | N                      |
|                                                                                                            |          |          | Dermoscopic images from primary skin cancer clinic in Queensland, Australia        | Train                                                                         | 5829                            | Not specified      | Dermoscopic              | solar lentigo, seborrheic keratosis, and lichen planus-like keratosis), dermatofibroma, melanoma, invasive squamous                      | Pathology                                                               | Y                    | N                                                     | N                                                 | N                    | Y                                |                                                         |                                                                                       |                        |
|                                                                                                            |          |          | Educational slides photographed and excised in the practice of one of the authors. | Internal Validation                                                           | 340 dermoscopic<br>635 clinical | Not specified      | Clinical and dermoscopic | cell carcinoma and keratoacanthoma, benign sebaceous neoplasms, and benign hair follicle tumors                                          | Pathology                                                               | Y                    | N                                                     | N                                                 | N                    | Y                                |                                                         |                                                                                       |                        |



| Title | PMID | Pub Year | Dataset Sources                                                                                                                         | Use of Dataset (Train, Internal Validation, Test, and/or External Validation) | Number of images used | Number of patients | Clinical or Dermoscopic  | Diseases                                                                                                                                                                                                                                                                                                                                                                                                                                                                                                                                                                                                                                                                                         | Label         | Gold Standard? (Y/N) | Fitzpatrick skin type description and breakdown (Y/N) | Ethnicity or race description and breakdown (Y/N) | Data Available (Y/N) | Image processing described (Y/N) | External test set used for statistical reporting? (Y/N) | Data evaluated in intended use setting by dermatologist (Reader study include)? (Y/N) | Model Available? (Y/N) |
|-------|------|----------|-----------------------------------------------------------------------------------------------------------------------------------------|-------------------------------------------------------------------------------|-----------------------|--------------------|--------------------------|--------------------------------------------------------------------------------------------------------------------------------------------------------------------------------------------------------------------------------------------------------------------------------------------------------------------------------------------------------------------------------------------------------------------------------------------------------------------------------------------------------------------------------------------------------------------------------------------------------------------------------------------------------------------------------------------------|---------------|----------------------|-------------------------------------------------------|---------------------------------------------------|----------------------|----------------------------------|---------------------------------------------------------|---------------------------------------------------------------------------------------|------------------------|
|       |      |          | Multiple sources, including the Medical University of Vienna, the image database from C.R., and a convenience sample of rare diagnoses. | Test                                                                          | 2072                  | Not specified      | Clinical and dermoscopic | Actinic Keratosis, Intraepithelial Carcinoma (Bowen's), In Situ Squamous Cell Carcinoma, Basal Cell Carcinoma, Atypical Fibroxanthoma, Kaposi Sarcoma, Merkel Cell Carcinoma, Melanoma, Melanoma Metastases, Morbus Paget, Neurofibrosarcoma, Keratoacanthoma, Invasive Squamous Cell Carcinoma, Sebaceous carcinoma, Syringoid carcinoma, Trichilemmal carcinoma, Fibrous papule, Angiofibroma, Angioma; Angiokeratoma, Benign Inverted Follicular Keratosis, Lichen Planus-like Keratosis, Seborrheic Keratosis, Clear Cell Acanthoma, Chromoblastomycosis, Chondrodermatitis nodularis helices, Collagenoma, Cyst, Dermatitis, Dermatofibroma, Eccrine poroma, Epidermolytic acanthoma, Acral | Not specified | Y                    | N                                                     | N                                                 | N                    | Y                                |                                                         |                                                                                       |                        |

| Title                                                                   | PMID     | Pub Year | Dataset Sources | Use of Dataset (Train, Internal Validation, Test, and/or External Validation) | Number of images used | Number of patients | Clinical or Dermoscopic | Diseases                                                                                                                                                                                                                                                                                                                                                                                                                                                                                           | Label                                                                                                                                       | Gold Standard? (Y/N)                                                                                                                  | Fitzpatrick skin type description and breakdown (Y/N) | Ethnicity or race description and breakdown (Y/N)                                                                 | Data Available (Y/N) | Image processing described (Y/N) | External test set used for statistical reporting? (Y/N) | Data evaluated in intended use setting by dermatologist (Reader study include)? (Y/N) | Model Available? (Y/N) |  |
|-------------------------------------------------------------------------|----------|----------|-----------------|-------------------------------------------------------------------------------|-----------------------|--------------------|-------------------------|----------------------------------------------------------------------------------------------------------------------------------------------------------------------------------------------------------------------------------------------------------------------------------------------------------------------------------------------------------------------------------------------------------------------------------------------------------------------------------------------------|---------------------------------------------------------------------------------------------------------------------------------------------|---------------------------------------------------------------------------------------------------------------------------------------|-------------------------------------------------------|-------------------------------------------------------------------------------------------------------------------|----------------------|----------------------------------|---------------------------------------------------------|---------------------------------------------------------------------------------------|------------------------|--|
|                                                                         |          |          |                 |                                                                               |                       |                    |                         | fibrokeratoma, Cylindroma; Hidradenoma; Spiradenoma, Lichen sclerosus, Mastocytosis, Molluscum contagiosum, Morphea, Neurofibroma, Neurilemmoma, Nevus, Pilomatrixoma, Porokeratosis, Prurigo nodularis, Pseudolymphoma, Psoriasis, Pyogenic granuloma, Scar, Sebaceous epithelioma, Sebaceous hyperplasia, Sebaceous adenoma, Skin tag, Fibroma, Syringocystadenoma, Trichilemmoma, Trichoepithelioma, Trichoblastoma, Tungiasis, Vascular malformation, Venous lake, Viral wart, Xanthogranuloma |                                                                                                                                             |                                                                                                                                       |                                                       |                                                                                                                   |                      |                                  |                                                         |                                                                                       |                        |  |
| From Deep Learning Towards Finding Skin Lesion Biomarkers <sup>44</sup> | 31946474 | 2019     | ISIC 2018       | Train, Internal Validation, Test                                              | 10,015                | Not specified      | Dermoscopic             | Actinic keratosis, Intraepithelial carcinoma (Bowen's), Basal cell carcinoma, Benign keratosis, Dermatofibroma, Melanocytic nevi, Vascular skin lesions, Melanoma                                                                                                                                                                                                                                                                                                                                  | Actinic keratosis: consensus, Intraepithelial carcinoma (Bowen's): pathology, Basal cell carcinoma: pathology, Benign keratosis: consensus, | Actinic keratosis: Y<br>Intraepithelial carcinoma (Bowen's): Y<br>Basal cell carcinoma: Y<br>Benign keratosis: Y<br>Dermatofibroma: Y | N                                                     | Y<br><br>Nationality breakdown (as a percentage of the 10015 images in the dataset):<br><br>2.0% Portuguese (PH2) | Y                    | Y                                | N                                                       | N                                                                                     | N                      |  |

| Title                                                                  | PMID     | Pub Year | Dataset Sources | Use of Dataset (Train, Internal Validation, Test, and/or External Validation) | Number of images used | Number of patients | Clinical or Dermoscopic | Diseases                                                                                                                                                          | Label                                                                                                                                                                                                                                                                          | Gold Standard? (Y/N)                                                                                                                                                                                    | Fitzpatrick skin type description and breakdown (Y/N) | Ethnicity or race description and breakdown (Y/N)                                                                                                                                                             | Data Available (Y/N) | Image processing described (Y/N) | External test set used for statistical reporting? (Y/N) | Data evaluated in intended use setting by dermatologist (Reader study include)? (Y/N) | Model Available? (Y/N)            |
|------------------------------------------------------------------------|----------|----------|-----------------|-------------------------------------------------------------------------------|-----------------------|--------------------|-------------------------|-------------------------------------------------------------------------------------------------------------------------------------------------------------------|--------------------------------------------------------------------------------------------------------------------------------------------------------------------------------------------------------------------------------------------------------------------------------|---------------------------------------------------------------------------------------------------------------------------------------------------------------------------------------------------------|-------------------------------------------------------|---------------------------------------------------------------------------------------------------------------------------------------------------------------------------------------------------------------|----------------------|----------------------------------|---------------------------------------------------------|---------------------------------------------------------------------------------------|-----------------------------------|
|                                                                        |          |          |                 |                                                                               |                       |                    |                         |                                                                                                                                                                   | Dermatofibroma: consensus.<br>Melanocytic nevi: consensus,<br>Vascular skin lesions: consensus,<br>Melanoma: consensus                                                                                                                                                         | Melanocytic nevi: Y<br>Vascular skin lesions: Y<br>Melanoma: Y                                                                                                                                          |                                                       | 22.6% Australian (Rosendahl)<br>Austrian (ViDIR)<br>Not specified (Atlas and ISIC 2017)                                                                                                                       |                      |                                  |                                                         |                                                                                       |                                   |
| Human-computer collaboration for skin cancer recognition <sup>45</sup> | 32572267 | 2020     | HAM10000        | Train                                                                         | 10,015                | Not specified      | Dermoscopic             | Actinic keratosis, Intraepithelial carcinoma (Bowen's), Basal cell carcinoma, Benign keratosis, Dermatofibroma, Melanocytic nevi, Vascular skin lesions, Melanoma | Actinic keratosis: consensus,<br>Intraepithelial carcinoma (Bowen's): pathology,<br>Basal cell carcinoma: pathology,<br>Benign keratosis: consensus,<br>Dermatofibroma: consensus,<br>Melanocytic nevi: consensus,<br>Vascular skin lesions: consensus,<br>Melanoma: consensus | Actinic keratosis: Y<br>Intraepithelial carcinoma (Bowen's): Y<br>Basal cell carcinoma: Y<br>Benign keratosis: Y<br>Dermatofibroma: Y<br>Melanocytic nevi: Y<br>Vascular skin lesions: Y<br>Melanoma: Y | N                                                     | Y<br><br>Nationality breakdown (as a percentage of the 10,015 images in the dataset):<br><br>2.0% Portuguese (PH2)<br>22.6% Australian (Rosendahl)<br>Austrian (ViDIR)<br>Not specified (Atlas and ISIC 2017) | Y                    | Y                                |                                                         | Y                                                                                     | Y<br><br>(available upon request) |

| Title | PMID | Pub Year | Dataset Sources      | Use of Dataset (Train, Internal Validation, Test, and/or External Validation) | Number of images used      | Number of patients | Clinical or Dermoscopic | Diseases                                                                                                                                                                      | Label                                                                                                                                                                                                                                                                              | Gold Standard? (Y/N) | Fitzpatrick skin type description and breakdown (Y/N)                   | Ethnicity or race description and breakdown (Y/N) | Data Available (Y/N) | Image processing described (Y/N) | External test set used for statistical reporting? (Y/N) | Data evaluated in intended use setting by dermatologist (Reader study include)? (Y/N) | Model Available? (Y/N) |
|-------|------|----------|----------------------|-------------------------------------------------------------------------------|----------------------------|--------------------|-------------------------|-------------------------------------------------------------------------------------------------------------------------------------------------------------------------------|------------------------------------------------------------------------------------------------------------------------------------------------------------------------------------------------------------------------------------------------------------------------------------|----------------------|-------------------------------------------------------------------------|---------------------------------------------------|----------------------|----------------------------------|---------------------------------------------------------|---------------------------------------------------------------------------------------|------------------------|
|       |      |          | ISIC 2018            | Test                                                                          | 1412                       | Not specified      | Dermoscopic             | Actinic keratosis, Intraepithelial carcinoma (Bowen's), Basal cell carcinoma, Benign keratosis, Dermatofibroma, Melanocytic nevi, Vascular skin lesions, Melanoma             | Routine pathology evaluation (n=786)<br><br>Biology (that is, >1.5 years of sequential dermoscopic imaging without changes (n= 458))<br><br>Expert consensus in common, straightforward, non-melanocytic cases that were not excised (n= 260)<br><br>In vivo confocal images (n=7) | Y                    | Y, partial<br><br>Description yes, breakdown no<br><br>Skin types I-III | Y, partial<br><br>"Mainly European ancestry"      | Y                    | Y                                |                                                         |                                                                                       |                        |
|       |      |          | Telemedicine dataset | External Validation, Test                                                     | 1,521 images (596 lesions) | 93                 | Dermoscopic             | Actinic keratosis<br>Intraepithelial carcinoma (Bowen's)<br>Basal cell carcinoma<br>Benign keratosis<br>Dermatofibroma<br>Melanocytic nevi<br>Vascular skin lesions, Melanoma | Face-to-face examination by an experienced board-certified dermatologist (H.P.S.) or the histopathologic report, in cases where the lesion was removed, served as the ground truth.                                                                                                | Cannot be determined | N                                                                       | N                                                 | N                    |                                  |                                                         |                                                                                       |                        |

| Title                                                                                                         | PMID     | Pub Year | Dataset Sources                                                                                                              | Use of Dataset (Train, Internal Validation, Test, and/or External Validation)                                 | Number of images used | Number of patients | Clinical or Dermoscopic | Diseases                                                                                                                                                                      | Label                                                                                                                                                                                                          | Gold Standard? (Y/N) | Fitzpatrick skin type description and breakdown (Y/N) | Ethnicity or race description and breakdown (Y/N)                | Data Available (Y/N)                                                              | Image processing described (Y/N) | External test set used for statistical reporting? (Y/N) | Data evaluated in intended use setting by dermatologist (Reader study include)? (Y/N) | Model Available? (Y/N) |
|---------------------------------------------------------------------------------------------------------------|----------|----------|------------------------------------------------------------------------------------------------------------------------------|---------------------------------------------------------------------------------------------------------------|-----------------------|--------------------|-------------------------|-------------------------------------------------------------------------------------------------------------------------------------------------------------------------------|----------------------------------------------------------------------------------------------------------------------------------------------------------------------------------------------------------------|----------------------|-------------------------------------------------------|------------------------------------------------------------------|-----------------------------------------------------------------------------------|----------------------------------|---------------------------------------------------------|---------------------------------------------------------------------------------------|------------------------|
|                                                                                                               |          |          |                                                                                                                              |                                                                                                               |                       |                    |                         |                                                                                                                                                                               |                                                                                                                                                                                                                |                      |                                                       |                                                                  |                                                                                   |                                  |                                                         |                                                                                       |                        |
|                                                                                                               |          |          | Department of Dermatology at the Medical University of Vienna for dermoscopy images taken between April and September 2019   | External Validation                                                                                           | 79                    | Not specified      | Dermoscopic             | Actinic keratosis<br>Intraepithelial carcinoma (Bowen's)<br>Basal cell carcinoma<br>Benign keratosis<br>Dermatofibroma<br>Melanocytic nevi<br>Vascular skin lesions, Melanoma | Lesion was excised and had a definite histopathologic diagnosis and if lesions were examined by a physician who was responsible for the face-to-face diagnosis of at least two other cases in this time period | Y                    | N                                                     | N                                                                | N                                                                                 | Y                                |                                                         |                                                                                       |                        |
| Keratinocytic Skin Cancer Detection on the Face Using Region-Based Convolutional Neural Network <sup>46</sup> | 31799995 | 2020     | Primary training dataset (Asan Medical Center, MED-NODE, Seven-point Checklist Dermatology Dataset, images on the internet). | Train, Internal Validation (Note: secondary and tertiary training were created from primary training dataset) | 182,348               | Not specified      | Clinical                | 178 disorders                                                                                                                                                                 | Clinical diagnosis and manual annotation based on image findings                                                                                                                                               | Cannot be determined | N                                                     | Y, partial - Asan Medical Center - Asian<br>Others not specified | Y, partial – MED-NODE and Seven-point Checklist Dermatology Dataset are available | Y                                | Y                                                       | Y                                                                                     | Y                      |
|                                                                                                               |          |          | Asan Medical Center Validation                                                                                               | Test                                                                                                          | 1570                  | 386                | Clinical                | basal cell carcinoma, squamous cell                                                                                                                                           | Biopsy-proven                                                                                                                                                                                                  |                      | No                                                    | Asian                                                            | No                                                                                | Yes                              |                                                         |                                                                                       |                        |

| Title                                                                                                                                                                                                                                   | PMID     | Pub Year | Dataset Sources                             | Use of Dataset (Train, Internal Validation, Test, and/or External Validation) | Number of images used | Number of patients | Clinical or Dermoscopic  | Diseases                                                                                                                                                                                     | Label                                                                                                                                                   | Gold Standard? (Y/N)                            | Fitzpatrick skin type description and breakdown (Y/N) | Ethnicity or race description and breakdown (Y/N) | Data Available (Y/N) | Image processing described (Y/N) | External test set used for statistical reporting? (Y/N) | Data evaluated in intended use setting by dermatologist (Reader study include)? (Y/N) | Model Available? (Y/N)      |  |
|-----------------------------------------------------------------------------------------------------------------------------------------------------------------------------------------------------------------------------------------|----------|----------|---------------------------------------------|-------------------------------------------------------------------------------|-----------------------|--------------------|--------------------------|----------------------------------------------------------------------------------------------------------------------------------------------------------------------------------------------|---------------------------------------------------------------------------------------------------------------------------------------------------------|-------------------------------------------------|-------------------------------------------------------|---------------------------------------------------|----------------------|----------------------------------|---------------------------------------------------------|---------------------------------------------------------------------------------------|-----------------------------|--|
|                                                                                                                                                                                                                                         |          |          | Hallym National University Validation       | Test, External Validation                                                     | 542                   | 142                | Clinical                 | carcinoma, malignant melanoma, squamous cell carcinoma                                                                                                                                       | Biopsy-proven                                                                                                                                           |                                                 | No                                                    | Asian                                             | No                   | Yes                              |                                                         |                                                                                       |                             |  |
|                                                                                                                                                                                                                                         |          |          | Chonnam University Validation               | Test, External Validation                                                     | 732                   | 145                | Clinical                 | carcinoma in situ, seborrheic keratosis, actinic keratosis, hemangioma, pyogenic granuloma, melanocytic nevus, and dermatofibroma)                                                           | Biopsy-proven                                                                                                                                           |                                                 | No                                                    | Asian                                             | No                   | Yes                              |                                                         |                                                                                       |                             |  |
| Man against machine reloaded: performance of a market-approved convolutional neural network in classifying a broad spectrum of skin lesions in comparison with 96 dermatologists working under less artificial conditions <sup>47</sup> | 31912788 | 2020     | Convenience sample, not otherwise specified | External Validation                                                           | 100                   | Not specified      | Clinical and Dermoscopic | Melanoma, basal cell carcinoma, squamous cell carcinoma, actinic keratosis, Bowen's disease, melanocytic nevi of various types, seborrheic keratosis, solar lentigo, angioma, dermatofibroma | Histopathology for 100% of malignant lesions<br><br>Histopathology for 75% of benign lesions, unremarkable follow-up >2 years for 25% of benign lesions | Malignant lesions – Y<br><br>Benign lesions – Y | N                                                     | N                                                 | N                    | N                                | Y                                                       | Y                                                                                     | Y<br><br>(Moleanalyzer Pro) |  |
|                                                                                                                                                                                                                                         |          |          | MSK-1                                       | External Validation                                                           | 1100                  | Not specified      | Dermoscopic              | Not specified in paper                                                                                                                                                                       | Not specified in paper                                                                                                                                  | Cannot be determined                            | N                                                     | N                                                 | Y                    | N                                |                                                         |                                                                                       |                             |  |
|                                                                                                                                                                                                                                         |          |          | ISIC 2018 Challenge (sub-set)               | External Validation                                                           | 1511                  | Not specified      | Dermoscopic              | Not specified in paper                                                                                                                                                                       | Not specified in paper                                                                                                                                  | Cannot be determined                            | N                                                     | N                                                 | Y                    | N                                |                                                         |                                                                                       |                             |  |
| Man against machine: diagnostic performance of a deep learning convolutional neural network for dermoscopic melanoma                                                                                                                    | 29846502 | 2018     | ISIC Archive and cooperating dermatologists | Train, Internal Validation                                                    | Not specified         | Not specified      | Dermoscopic              | Non-melanoma Melanoma                                                                                                                                                                        | Benign (non-melanoma): expert consensus<br>Malignant (melanoma): pathology                                                                              | Non-melanoma: Y<br>Melanoma – Y                 | N                                                     | N                                                 | Y                    | Y                                | Y                                                       | Y                                                                                     | N                           |  |

| Title                                                                                              | PMID     | Pub Year | Dataset Sources                                                                                              | Use of Dataset (Train, Internal Validation, Test, and/or External Validation) | Number of images used | Number of patients | Clinical or Dermoscopic | Diseases                                                                        | Label                                                                                                                                       | Gold Standard? (Y/N)            | Fitzpatrick skin type description and breakdown (Y/N) | Ethnicity or race description and breakdown (Y/N) | Data Available (Y/N) | Image processing described (Y/N) | External test set used for statistical reporting? (Y/N) | Data evaluated in intended use setting by dermatologist (Reader study include)? (Y/N) | Model Available? (Y/N)   |
|----------------------------------------------------------------------------------------------------|----------|----------|--------------------------------------------------------------------------------------------------------------|-------------------------------------------------------------------------------|-----------------------|--------------------|-------------------------|---------------------------------------------------------------------------------|---------------------------------------------------------------------------------------------------------------------------------------------|---------------------------------|-------------------------------------------------------|---------------------------------------------------|----------------------|----------------------------------|---------------------------------------------------------|---------------------------------------------------------------------------------------|--------------------------|
| recognition in comparison to 58 dermatologists <sup>48</sup>                                       |          |          | Validated image library of the Department of Dermatology, University of Heidelberg, Germany                  | Test, External Validation                                                     | 300                   | Not specified      | Dermoscopic             | 20% Melanoma<br>80% benign nevi of “different subtypes” not otherwise specified | Melanomas (20%) all verified by pathology<br><br>Of the benign nevi (80%), 2/3 were non-excised lesions confirmed by follow up examinations | Y                               | N                                                     | N                                                 | N                    | N                                |                                                         |                                                                                       |                          |
|                                                                                                    |          |          | ISIC 2016 International Symposium on Biomedical Imaging (ISBI) challenge                                     | Test                                                                          | 100                   | Not specified      | Dermoscopic             | Non-melanoma Melanoma                                                           | Benign (non-melanoma): expert consensus<br>Malignant (melanoma): pathology                                                                  | Non-melanoma: Y<br>Melanoma – Y | N                                                     | N                                                 | Y                    | Y                                |                                                         |                                                                                       |                          |
| Melanoma detection by analysis of clinical images using convolutional neural network <sup>49</sup> | 28268581 | 2016     | Digital image archive of the Department of Dermatology of the University Medical Center Groningen (MED-NODE) | Train, Internal Validation, Test                                              | 170                   | Not specified      | Clinical                | Melanoma, benign nevi                                                           | Not specified                                                                                                                               | Cannot be determined            | N                                                     | N                                                 | Y                    | Y                                | N                                                       | N                                                                                     | N                        |
|                                                                                                    |          |          | Synthesized images                                                                                           | Train, Internal Validation, Test                                              | 5950                  | Not specified      | Clinical                | Melanoma, benign nevi                                                           | Not specified                                                                                                                               | Cannot be determined            | N                                                     | N                                                 | N                    |                                  |                                                         |                                                                                       |                          |
| Melanoma detection using adversarial training and deep transfer learning <sup>50</sup>             | 32252036 | 2020     | ISIC 2016                                                                                                    | Train, Internal Validation, Test                                              | 1279                  | Not specified      | Dermoscopic             | Benign, Melanoma                                                                | Benign (non-melanoma): expert consensus<br>Malignant (melanoma): pathology                                                                  | Y                               | N                                                     | N                                                 | Y                    | Y                                | N                                                       | Y                                                                                     | N                        |
|                                                                                                    |          |          | “Synthesized images obtained via generative adversarial training from ISIC 2016 dataset”                     | Train, Internal Validation, Test                                              | 727                   | Not specified      | Dermoscopic             | Benign, Malignant                                                               |                                                                                                                                             |                                 |                                                       |                                                   |                      |                                  |                                                         |                                                                                       |                          |
| Melanoma recognition by a deep learning convolutional neural network-                              | 31972395 | 2020     | 6 "dermoscopic image sets were randomly                                                                      | External Validation                                                           | 780                   | Not specified      | Dermoscopic             | Superficial spreading melanomas, macular nevi, lentigo maligna                  | melanoma cases (n = 180) - histopathological diagnosis                                                                                      | Y                               | N                                                     | N                                                 | N                    | N                                | Y<br>(external testing only)                            | N                                                                                     | Y<br>(Moleanalyzer-Pro®) |

| Title                                                                                                    | PMID     | Pub Year | Dataset Sources                                                                                          | Use of Dataset (Train, Internal Validation, Test, and/or External Validation) | Number of images used                                                                                                                                                                | Number of patients | Clinical or Dermoscopic  | Diseases                                                                                                                                                                                                                                                                                                             | Label                                                                                                                                                                                                                    | Gold Standard? (Y/N) | Fitzpatrick skin type description and breakdown (Y/N) | Ethnicity or race description and breakdown (Y/N) | Data Available (Y/N) | Image processing described (Y/N) | External test set used for statistical reporting? (Y/N) | Data evaluated in intended use setting by dermatologist (Reader study include)? (Y/N) | Model Available? (Y/N)                                                                                                                |
|----------------------------------------------------------------------------------------------------------|----------|----------|----------------------------------------------------------------------------------------------------------|-------------------------------------------------------------------------------|--------------------------------------------------------------------------------------------------------------------------------------------------------------------------------------|--------------------|--------------------------|----------------------------------------------------------------------------------------------------------------------------------------------------------------------------------------------------------------------------------------------------------------------------------------------------------------------|--------------------------------------------------------------------------------------------------------------------------------------------------------------------------------------------------------------------------|----------------------|-------------------------------------------------------|---------------------------------------------------|----------------------|----------------------------------|---------------------------------------------------------|---------------------------------------------------------------------------------------|---------------------------------------------------------------------------------------------------------------------------------------|
| Performance in different melanoma subtypes and localizations <sup>51</sup>                               |          |          | selected from image libraries of Departments of Dermatology, Universities of Heidelberg, Munich and Lyon |                                                                               |                                                                                                                                                                                      |                    |                          | melanomas, facial solar lentigines/seborrheic keratoses/nevi, nodular melanomas, papillomatous/dermal/blue nevi, mucosal melanomas, mucosal melanoses/macules/nevi, acrolentiginous melanomas, acral (congenital) nevi, nail, subungual melanomas, subungual (congenital), nevi/lentigines/ethnic type pigmentations | benign lesions (n = 600) - either based on histopathology (n = 363, 60.5%), or on an unremarkable follow-up by sequential digital dermoscopy over at least 2 years (n = 210, 35.0%), or on expert opinion (n = 27, 4.5%) |                      | fair skinned patients <sup>51</sup>                   |                                                   |                      |                                  |                                                         |                                                                                       |                                                                                                                                       |
| Multiclass Artificial Intelligence in Dermatology: Progress but Still Room for Improvement <sup>52</sup> | 33049269 | 2020     | ISIC 2018, JID editorial images                                                                          | External Validation                                                           | 100                                                                                                                                                                                  | Not specified      | Clinical                 | Cutaneous melanomas, basal cell carcinomas, squamous cell carcinomas                                                                                                                                                                                                                                                 | Sequentially biopsied                                                                                                                                                                                                    | Y                    | N                                                     | Y<br>100% Caucasian                               | Y                    | Y                                | Y                                                       | N                                                                                     | Y<br>(modelderm.com)                                                                                                                  |
| Multimodal skin lesion classification using deep learning <sup>53</sup>                                  | 30187575 | 2018     | Not specified other than a "Multiple skin cancer clinics"                                                | Train, Internal Validation, Test                                              | At least 5834. Not directly specified: each case contained at least a dermoscopic and macroscopic clinical image of the lesion, but may have also contained an image with a "general | 2917 cases         | Clinical and Dermoscopic | Benign nevi, melanoma, basal cell carcinoma, squamous cell carcinoma, pigmented benign keratoses                                                                                                                                                                                                                     | 100% of cases with histopathological diagnosis                                                                                                                                                                           | Y                    | N                                                     | N                                                 | N                    | Y                                | N                                                       | N                                                                                     | N<br>A comparison to ISIC 2017 for single image analysis; however no external testing of multimodal analysis (main task of the paper) |



| Title                                                                                                                          | PMID     | Pub Year | Dataset Sources                                                                                                                                                                                                                                                                                                                              | Use of Dataset (Train, Internal Validation, Test, and/or External Validation) | Number of images used | Number of patients | Clinical or Dermoscopic | Diseases                                                                                                                                                          | Label                                                                                                                                                                                                                                                                          | Gold Standard? (Y/N)                                                                                                                                                                                    | Fitzpatrick skin type description and breakdown (Y/N) | Ethnicity or race description and breakdown (Y/N) | Data Available (Y/N) | Image processing described (Y/N) | External test set used for statistical reporting? (Y/N) | Data evaluated in intended use setting by dermatologist (Reader study include)? (Y/N) | Model Available? (Y/N) |  |
|--------------------------------------------------------------------------------------------------------------------------------|----------|----------|----------------------------------------------------------------------------------------------------------------------------------------------------------------------------------------------------------------------------------------------------------------------------------------------------------------------------------------------|-------------------------------------------------------------------------------|-----------------------|--------------------|-------------------------|-------------------------------------------------------------------------------------------------------------------------------------------------------------------|--------------------------------------------------------------------------------------------------------------------------------------------------------------------------------------------------------------------------------------------------------------------------------|---------------------------------------------------------------------------------------------------------------------------------------------------------------------------------------------------------|-------------------------------------------------------|---------------------------------------------------|----------------------|----------------------------------|---------------------------------------------------------|---------------------------------------------------------------------------------------|------------------------|--|
|                                                                                                                                |          |          |                                                                                                                                                                                                                                                                                                                                              |                                                                               | overview of the body” |                    |                         |                                                                                                                                                                   |                                                                                                                                                                                                                                                                                |                                                                                                                                                                                                         |                                                       |                                                   |                      |                                  |                                                         |                                                                                       |                        |  |
| Multiple skin lesions diagnostics via integrated deep convolutional networks for segmentation and classification <sup>54</sup> | 32028084 | 2020     | ISIC 2016                                                                                                                                                                                                                                                                                                                                    | Train, Test                                                                   | 1279                  | Not specified      | Dermoscopy              | Melanoma, “benign”                                                                                                                                                | Benign (non-melanoma): expert consensus<br>Malignant (melanoma): pathology                                                                                                                                                                                                     | N                                                                                                                                                                                                       | N                                                     | Y                                                 | Y                    | Y                                | N                                                       | N                                                                                     | N                      |  |
|                                                                                                                                |          |          | ISIC 2017                                                                                                                                                                                                                                                                                                                                    | Train, Internal Validation, Test                                              | 2750                  | Not specified      | Dermoscopy              | “Benign”, seborrheic keratosis, melanoma                                                                                                                          | Benign nevi: expert consensus<br>Seborrheic keratosis: expert consensus<br>Melanoma: pathology                                                                                                                                                                                 | N                                                                                                                                                                                                       | N                                                     | N                                                 | Y                    | Y                                |                                                         |                                                                                       |                        |  |
|                                                                                                                                |          |          | HAM10000 (ISIC 2018 Train)                                                                                                                                                                                                                                                                                                                   | Train, Internal Validation, Test                                              | 10,015                | Not specified      | Dermoscopy              | Actinic keratosis, Intraepithelial carcinoma (Bowen’s), Basal cell carcinoma, Benign keratosis, Dermatofibroma, Melanocytic nevi, Vascular skin lesions, Melanoma | Actinic keratosis: consensus,<br>Intraepithelial carcinoma (Bowen’s): pathology,<br>Basal cell carcinoma: pathology,<br>Benign keratosis: consensus,<br>Dermatofibroma: consensus,<br>Melanocytic nevi: consensus,<br>Vascular skin lesions: consensus,<br>Melanoma: consensus | Actinic keratosis: Y<br>Intraepithelial carcinoma (Bowen’s): Y<br>Basal cell carcinoma: Y<br>Benign keratosis: Y<br>Dermatofibroma: Y<br>Melanocytic nevi: Y<br>Vascular skin lesions: Y<br>Melanoma: Y | N                                                     | N                                                 | Y                    | Y                                |                                                         |                                                                                       |                        |  |
| Novel Approaches for Diagnosing Melanoma Skin Lesions Through Supervised and Deep Learning Algorithms <sup>55</sup>            | 26872778 | 2016     | Various repositories<br><br>( <a href="http://www.bccancer.bc.ca/health-professionals/clinical-resources/skin-cancer-atlas">http://www.bccancer.bc.ca/health-professionals/clinical-resources/skin-cancer-atlas</a> ,<br><a href="https://dermnetz.org">https://dermnetz.org</a> ,<br><a href="http://meddean.luc.edu">meddean.luc.edu</a> ) | Train, Internal Validation, Test                                              | 992                   | Not specified      | Dermoscopy              | Melanoma, “non-melanoma” not otherwise specified                                                                                                                  | (presumably pre-labeled in the contributing datasets)                                                                                                                                                                                                                          | N                                                                                                                                                                                                       | N                                                     | N                                                 | Y                    | Y                                | N                                                       | N                                                                                     | N                      |  |

| Title                                                                                                                                                                                                         | PMID     | Pub Year | Dataset Sources                                                                                               | Use of Dataset (Train, Internal Validation, Test, and/or External Validation) | Number of images used | Number of patients | Clinical or Dermoscopic | Diseases                                                                                                                                                                                                                                                                                                                                                            | Label                                                                                                                                                                                                                                                                                                                                                        | Gold Standard? (Y/N)                                                                                                                                                            | Fitzpatrick skin type description and breakdown (Y/N) | Ethnicity or race description and breakdown (Y/N) | Data Available (Y/N) | Image processing described (Y/N) | External test set used for statistical reporting? (Y/N) | Data evaluated in intended use setting by dermatologist (Reader study include)? (Y/N) | Model Available? (Y/N)                                                                                                           |
|---------------------------------------------------------------------------------------------------------------------------------------------------------------------------------------------------------------|----------|----------|---------------------------------------------------------------------------------------------------------------|-------------------------------------------------------------------------------|-----------------------|--------------------|-------------------------|---------------------------------------------------------------------------------------------------------------------------------------------------------------------------------------------------------------------------------------------------------------------------------------------------------------------------------------------------------------------|--------------------------------------------------------------------------------------------------------------------------------------------------------------------------------------------------------------------------------------------------------------------------------------------------------------------------------------------------------------|---------------------------------------------------------------------------------------------------------------------------------------------------------------------------------|-------------------------------------------------------|---------------------------------------------------|----------------------|----------------------------------|---------------------------------------------------------|---------------------------------------------------------------------------------------|----------------------------------------------------------------------------------------------------------------------------------|
| Past and present of computer-assisted dermoscopic diagnosis: performance of a conventional image analyzer versus a convolutional neural network in a prospective data set of 1,981 skin lesions <sup>56</sup> | 32534243 | 2020     | Images collected from patients at increased melanoma risk                                                     | External Validation                                                           | 1981                  | 435                | Dermoscopic             | Melanocytic nevi, seborrheic keratoses, vascular lesions, dermatofibromas, melanomas, basal cell carcinomas                                                                                                                                                                                                                                                         | In 785 (39.6%) excised lesions, the results of the histopathological examinations were used as a reference standard.<br><br>In the remaining 1196 (60.4%) non-excised benign lesions, the diagnoses were based on expert consensus (H.A.H., J.K.W., K.S.) in combination with an uneventful follow-up by sequential digital dermoscopy for at least 2 years. | N                                                                                                                                                                               | N                                                     | N                                                 | N                    | N                                | Y                                                       | N                                                                                     | Yes<br><br>CNN = Moleanalyzer-Pro™<br><br>CIA = Moleanalyzer-3™/Dynamole™                                                        |
| Performance of a deep learning-based application for the diagnosis of basal cell carcinoma in Indian patients as compared to dermatologists and non-dermatologists <sup>57</sup>                              | 33040407 | 2020     | Public archives (Hellenic Derm Atlas, <a href="http://www.danderm.dk/atlas">http://www.danderm.dk/atlas</a> ) | Train, Internal Validation                                                    | 17,784                | Not specified      | Clinical                | Basal cell carcinoma, seborrheic keratosis, keratoacanthoma, viral warts, sarcoidosis, congenital melanocytic nevus, melanoma, keloids, cylindroma, granuloma faciale, nodulocystic acne, nevus sebaceous, rosacea, verrucous, epidermal nevus, nevus comedonicus, angiolymphoid hyperplasia with eosinophilia, angiofibrome, hyperplastic port-wine stain, discoid | BCC lesions – proven by histopathology<br><br>Non-BCC lesions – consensus diagnosis by 2 dermatologists, or confirmed by histopathology                                                                                                                                                                                                                      | BCC: Y<br><br>Melanoma: Cannot be determined (grouped into non-BCC but not specified whether melanomas in the set of images were biopsy-proven)<br><br>Other non-BCC lesions: Y | N                                                     | N                                                 | Y                    | N                                | Unclear what the source of the test images were         | Y                                                                                     | N<br><br>(Mobile app has been developed but no indication in this paper whether it is available, commercially and/or by request) |
|                                                                                                                                                                                                               |          |          | Images from dermatologists across India                                                                       | Train, Internal Validation                                                    |                       | Not specified      | Clinical                |                                                                                                                                                                                                                                                                                                                                                                     |                                                                                                                                                                                                                                                                                                                                                              |                                                                                                                                                                                 |                                                       |                                                   |                      |                                  |                                                         |                                                                                       |                                                                                                                                  |

| Title                                                                                                               | PMID     | Pub Year | Dataset Sources                                                                     | Use of Dataset (Train, Internal Validation, Test, and/or External Validation) | Number of images used | Number of patients | Clinical or Dermoscopic | Diseases                                                                                                                                                                                                                                                                                                                                                                                       | Label                                                                                                                                                                                                                                                                                                                                                                                                                                    | Gold Standard? (Y/N) | Fitzpatrick skin type description and breakdown (Y/N)                                                                             | Ethnicity or race description and breakdown (Y/N) | Data Available (Y/N) | Image processing described (Y/N) | External test set used for statistical reporting? (Y/N) | Data evaluated in intended use setting by dermatologist (Reader study include)? (Y/N) | Model Available? (Y/N)                                           |
|---------------------------------------------------------------------------------------------------------------------|----------|----------|-------------------------------------------------------------------------------------|-------------------------------------------------------------------------------|-----------------------|--------------------|-------------------------|------------------------------------------------------------------------------------------------------------------------------------------------------------------------------------------------------------------------------------------------------------------------------------------------------------------------------------------------------------------------------------------------|------------------------------------------------------------------------------------------------------------------------------------------------------------------------------------------------------------------------------------------------------------------------------------------------------------------------------------------------------------------------------------------------------------------------------------------|----------------------|-----------------------------------------------------------------------------------------------------------------------------------|---------------------------------------------------|----------------------|----------------------------------|---------------------------------------------------------|---------------------------------------------------------------------------------------|------------------------------------------------------------------|
|                                                                                                                     |          |          | Test dataset                                                                        | Test                                                                          | 100                   | Not specified      | Clinical                | lupus erythematosus<br>BCC and non-BCC                                                                                                                                                                                                                                                                                                                                                         | BCC lesions – proven by histopathology<br><br>Non-BCC lesions – consensus diagnosis by 2 dermatologists, or confirmed by histopathology                                                                                                                                                                                                                                                                                                  | Y                    | N                                                                                                                                 | N                                                 | N                    | N                                |                                                         |                                                                                       |                                                                  |
| Performance of a deep neural network in teledermatology: a single-centre prospective diagnostic study <sup>58</sup> | 33037709 | 2020     | Patients from telemedicine dermatology visits from a single academic medical center | External Validation                                                           | 340                   | 281                | Clinical                | 5 categories and 13 subcategories: (1) ‘inflammatory’ (subcategories: dermatitis, acne/rosacea, autoimmune, papulosquamous and other); (2) ‘infectious’ (subcategories: bacterial, viral, fungal and parasitic); (3) ‘neoplastic’ (subcategories: malignant and benign); (4) ‘alopecia’ (subcategories: scarring and non-scarring); and (5) ‘other’ (e.g. burn, scar, striae and among others) | 2 approaches: First, if the patient was recommended to return for an in-person clinic visit, the diagnosis from this visit (and any associated laboratory testing or skin biopsies) was used as the reference standard. Second, if no in-person clinic visit was performed, a panel of 6 dermatologists evaluated the case and established the reference standard based on consensus agreement.<br><br>No specification of which lesions | Cannot be determined | Y<br>Type I: 7 (2.1%)<br>Type II: 59 (17.4%)<br>Type III: 190 (55.9%)<br>Type IV: 84 (24.7%)<br>Type V: 0 (0%)<br>Type VI: 0 (0%) | N                                                 | N                    | N                                | Y<br>External validation only                           | Y                                                                                     | Y<br>( <a href="http://modelderm.com">http://modelderm.com</a> ) |

| Title                                                                                                                                  | PMID     | Pub Year | Dataset Sources                                                          | Use of Dataset (Train, Internal Validation, Test, and/or External Validation) | Number of images used | Number of patients | Clinical or Dermoscopic | Diseases                                    | Label                                                                                                                                                                                                                                 | Gold Standard? (Y/N)                                                  | Fitzpatrick skin type description and breakdown (Y/N) | Ethnicity or race description and breakdown (Y/N) | Data Available (Y/N) | Image processing described (Y/N) | External test set used for statistical reporting? (Y/N) | Data evaluated in intended use setting by dermatologist (Reader study include)? (Y/N) | Model Available? (Y/N)                                                     |  |
|----------------------------------------------------------------------------------------------------------------------------------------|----------|----------|--------------------------------------------------------------------------|-------------------------------------------------------------------------------|-----------------------|--------------------|-------------------------|---------------------------------------------|---------------------------------------------------------------------------------------------------------------------------------------------------------------------------------------------------------------------------------------|-----------------------------------------------------------------------|-------------------------------------------------------|---------------------------------------------------|----------------------|----------------------------------|---------------------------------------------------------|---------------------------------------------------------------------------------------|----------------------------------------------------------------------------|--|
|                                                                                                                                        |          |          |                                                                          |                                                                               |                       |                    |                         |                                             | were biopsied vs. only clinically assessed/consensus                                                                                                                                                                                  |                                                                       |                                                       |                                                   |                      |                                  |                                                         |                                                                                       |                                                                            |  |
| Prospective, comparative evaluation of a deep neural network and dermoscopy in the diagnosis of onychomycosis <sup>59</sup>            | 32525908 | 2020     | Clinical images obtained from four hospitals (not otherwise specified)   | External Validation                                                           | 90                    | 90                 | Clinical                | Onychomycosis                               | Direct microscopy with KOH and/or fungal culture were performed to confirm the diagnosis in all cases                                                                                                                                 | Y                                                                     | N                                                     | No                                                | N                    | Y                                | Y                                                       | External validation only                                                              | Y<br><a href="https://nail.modernderm.com">https://nail.modernderm.com</a> |  |
| Real-time burn depth assessment using artificial networks: a large-scale, multicentre study <sup>60</sup>                              | 32826097 | 2020     | Department of Burn Reconstruction Surgery, Xiangya Hospital              | Train, Internal Validation, Test                                              | 484                   | Not specified      | Clinical                | Shallow burns, moderate burns, deep burns   | Actual healing time of the burns designated categorization into shallow, moderate, or deep, and then experienced burn experts circled the actual wound surface<br><br>(no discussion of number of reviewers, consensus process, etc.) | N<br><br>Paper specifically says histopathology is the Gold Standards | N                                                     | N                                                 | N                    | Y                                | N                                                       | Y                                                                                     | N                                                                          |  |
| Region Extraction and Classification of Skin Cancer: A Heterogeneous framework of Deep CNN Features Fusion and Reduction <sup>61</sup> | 31327058 | 2019     | PH2                                                                      | Test                                                                          | 200                   | Not specified      | Dermoscopy              | “Benign”, “common nevi”, melanoma           | Assessment performed by an expert dermatologist based on clinical features                                                                                                                                                            | Melanoma – N                                                          | N                                                     | N                                                 | Y                    | Y                                | Y                                                       | N                                                                                     | N                                                                          |  |
|                                                                                                                                        |          |          | ISIC 2016 International Symposium on Biomedical Imaging (ISBI) challenge | Train, Internal Validation, Test                                              | 1279                  | Not specified      | Dermoscopy              | Non-melanoma, melanoma                      | Benign (non-melanoma): expert consensus<br>Malignant (melanoma): pathology                                                                                                                                                            | Non-melanoma: Y<br>Melanoma – Y                                       | N                                                     | N                                                 | Y                    |                                  |                                                         |                                                                                       |                                                                            |  |
|                                                                                                                                        |          |          | ISIC 2017 International Symposium on Biomedical Imaging (ISBI) challenge | Train, Internal Validation, Test                                              | 2750                  | Not specified      | Dermoscopy              | Benign nevi, seborrheic keratosis, melanoma | Benign nevi: expert consensus<br>Seborrheic keratosis: expert consensus<br>Melanoma: pathology                                                                                                                                        | Nevus: Y<br>Seborrheic keratosis: Y<br>Melanoma: Y                    | N                                                     | N                                                 | Y                    |                                  |                                                         |                                                                                       |                                                                            |  |

| Title                                                                                                                                                                                                                                                         | PMID     | Pub Year | Dataset Sources                                                          | Use of Dataset (Train, Internal Validation, Test, and/or External Validation) | Number of images used                      | Number of patients | Clinical or Dermoscopic | Diseases                                                                                                                                                                                                   | Label                                                                                                                                                                                                                                                                                                                                                                             | Gold Standard? (Y/N) | Fitzpatrick skin type description and breakdown (Y/N) | Ethnicity or race description and breakdown (Y/N) | Data Available (Y/N) | Image processing described (Y/N) | External test set used for statistical reporting? (Y/N) | Data evaluated in intended use setting by dermatologist (Reader study include)? (Y/N) | Model Available? (Y/N) |
|---------------------------------------------------------------------------------------------------------------------------------------------------------------------------------------------------------------------------------------------------------------|----------|----------|--------------------------------------------------------------------------|-------------------------------------------------------------------------------|--------------------------------------------|--------------------|-------------------------|------------------------------------------------------------------------------------------------------------------------------------------------------------------------------------------------------------|-----------------------------------------------------------------------------------------------------------------------------------------------------------------------------------------------------------------------------------------------------------------------------------------------------------------------------------------------------------------------------------|----------------------|-------------------------------------------------------|---------------------------------------------------|----------------------|----------------------------------|---------------------------------------------------------|---------------------------------------------------------------------------------------|------------------------|
| Results of the 2016 International Skin Imaging Collaboration International Symposium on Biomedical Imaging challenge: Comparison of the accuracy of computer algorithms to dermatologists for the diagnosis of melanoma from dermoscopic images <sup>62</sup> | 28969863 | 2018     | ISIC 2016 International Symposium on Biomedical Imaging (ISBI) challenge | Test                                                                          | 100                                        | Not specified      | Dermoscopic             | Melanoma, benign nevi, lentiginos                                                                                                                                                                          | All melanomas and a majority of the nevi/lentiginos (n = 869, 84%) had been histopathologically examined. Nonhistopathologically examined nevi (n = 162) originated from a longitudinal study of children; selection from this dataset was biased to include lesions with the largest diameters, and all images were reviewed by ≥2 dermatologists to confirm their benign nature | Y                    | N                                                     | N                                                 | Y                    | N                                | N                                                       | Y                                                                                     | N                      |
| Ros-NET: A deep convolutional neural network for automatic identification of rosacea lesions <sup>63</sup>                                                                                                                                                    | 31849118 | 2019     | Ohio State University (OSU) Division of Dermatology                      | Train, Internal Validation, Test                                              | 41 (each image contains 3 different views) | 41                 | Clinical                | Rosacea                                                                                                                                                                                                    | Identifiable features of images are blacked out before the development of the algorithm, and the ground truth was provided by an experienced dermatologist                                                                                                                                                                                                                        | Y                    | N                                                     | N                                                 | N                    | Y                                | N                                                       | N                                                                                     | N                      |
| Smart identification of psoriasis by images using convolutional neural networks: a case study in China <sup>64</sup>                                                                                                                                          | 31541556 | 2019     | XiangyaDerm-Pso9 dataset from Xiangya hospital                           | Train, Internal validation, Test                                              | 8,021                                      | Not specified      | Clinical                | Lichen planus (LP), parapsoriasis (Par), lupus erythematosus (LE), basal cell carcinoma (BCC), squamous cell carcinoma (SCC), eczema (Ecz), pemphigus (Pem), psoriasis (Pso) and seborrheic keratosis (SK) | All images are verified by pathological examination and medical history by 3 professional dermatologists who have been engaged in dermatology for more than 10 years from Xiangya Hospital                                                                                                                                                                                        | Y                    | N                                                     | N                                                 | N                    | Y                                | N                                                       | Y                                                                                     | N                      |
| Superior skin cancer classification by the combination of                                                                                                                                                                                                     | 31518967 | 2019     | ISIC Archive (most from HAM10000)                                        | Train, Internal Validation, Test                                              | 11,444                                     | Not specified      | Dermoscopic             | Melanoma, nevus, basal cell carcinoma, actinic keratosis, Bower's                                                                                                                                          | 11,444 images, 6390 of which had been biopsy verified (note test                                                                                                                                                                                                                                                                                                                  | Y                    | N                                                     | N                                                 | Y                    | N                                | N                                                       | Y                                                                                     | N                      |

| Title                                                                                                                                         | PMID     | Pub Year | Dataset Sources                                                                        | Use of Dataset (Train, Internal Validation, Test, and/or External Validation) | Number of images used | Number of patients | Clinical or Dermoscopic | Diseases                                                                                                                                                                                                                               | Label                                                                                                                                                                                                                                 | Gold Standard? (Y/N) | Fitzpatrick skin type description and breakdown (Y/N) | Ethnicity or race description and breakdown (Y/N) | Data Available (Y/N) | Image processing described (Y/N) | External test set used for statistical reporting? (Y/N) | Data evaluated in intended use setting by dermatologist (Reader study include)? (Y/N) | Model Available? (Y/N) |
|-----------------------------------------------------------------------------------------------------------------------------------------------|----------|----------|----------------------------------------------------------------------------------------|-------------------------------------------------------------------------------|-----------------------|--------------------|-------------------------|----------------------------------------------------------------------------------------------------------------------------------------------------------------------------------------------------------------------------------------|---------------------------------------------------------------------------------------------------------------------------------------------------------------------------------------------------------------------------------------|----------------------|-------------------------------------------------------|---------------------------------------------------|----------------------|----------------------------------|---------------------------------------------------------|---------------------------------------------------------------------------------------|------------------------|
| human and artificial intelligence <sup>65</sup>                                                                                               |          |          | (ISIC 2018 Train))                                                                     |                                                                               |                       |                    |                         | disease, squamous cell carcinoma, seborrheic keratosis, lentigo solaris, lichen ruber planus                                                                                                                                           | set only came from biopsy verified samples)                                                                                                                                                                                           |                      |                                                       |                                                   |                      |                                  |                                                         |                                                                                       |                        |
| Systematic outperformance of 112 dermatologists in multiclass skin cancer image classification by convolutional neural networks <sup>66</sup> | 31419752 | 2019     | ISIC Archive (most from HAM10000 (ISIC 2018 Train))                                    | Train, Internal Validation, Test                                              | 11,444                | Not specified      | Dermoscopic             | Actinic keratosis, intraepithelial carcinoma (Bowen disease), squamous cell carcinoma, basal cell carcinoma, benign keratosis, including seborrheic keratosis, solar lentigo, lichen planus-like keratosis, melanocytic nevi, melanoma | 11,444 images, 6390 of which had been biopsy verified (note test set only came from biopsy verified samples)                                                                                                                          | Y                    | N                                                     | N                                                 | Y                    | N                                | N                                                       | Y                                                                                     | N                      |
| The Application of Deep Learning in the Risk Grading of Skin Tumors for Patients Using Clinical Images <sup>67</sup>                          | 31300897 | 2019     | XiangyaDerm                                                                            | Train, Internal Validation, Test                                              | 4,500                 | Not specified      | Clinical                | Junctional nevus, intradermal nevus, dermatofibroma, lipoma, seborrheic keratosis, Bowen's disease, basal cell carcinoma, actinic keratosis, squamous cell carcinoma, malignant melanoma                                               | Each image has a corresponding pathological diagnosis, then confirmed by information in the medical record and doctors' experience                                                                                                    | Y                    | N                                                     | N                                                 | N                    | Y                                | N                                                       | Y                                                                                     | N                      |
| The Development of a Skin Cancer Classification System for Pigmented Skin Lesions Using Deep Learning <sup>68</sup>                           | 32751349 | 2020     | Department Dermatologic Oncology in the National Cancer Center Hospital (Tokyo, Japan) | Train, Internal Validation, Test                                              | 5846                  | 3551               | Clinical                | Malignant melanoma, base cell carcinoma, benign nevi, seborrheic keratosis, senile lentigo, hematoma/hemangioma                                                                                                                        | All malignant tumors were biopsied and diagnosed histopathologically. Benign tumors were diagnosed clinically using dermoscopy, and those cases that were still difficult to differentiate were biopsied to make confirmed diagnosis. | Y                    | N                                                     | N                                                 | N                    | N                                | N                                                       | Y                                                                                     | N                      |

| Title                                                                                                           | PMID     | Pub Year | Dataset Sources                       | Use of Dataset (Train, Internal Validation, Test, and/or External Validation) | Number of images used | Number of patients | Clinical or Dermoscopic | Diseases                                                                                                                                                          | Label                                                                                                                                                                                                                                                                   | Gold Standard? (Y/N)                                                                                                                                                                                    | Fitzpatrick skin type description and breakdown (Y/N) | Ethnicity or race description and breakdown (Y/N) | Data Available (Y/N) | Image processing described (Y/N) | External test set used for statistical reporting? (Y/N) | Data evaluated in intended use setting by dermatologist (Reader study include)? (Y/N) | Model Available? (Y/N) |
|-----------------------------------------------------------------------------------------------------------------|----------|----------|---------------------------------------|-------------------------------------------------------------------------------|-----------------------|--------------------|-------------------------|-------------------------------------------------------------------------------------------------------------------------------------------------------------------|-------------------------------------------------------------------------------------------------------------------------------------------------------------------------------------------------------------------------------------------------------------------------|---------------------------------------------------------------------------------------------------------------------------------------------------------------------------------------------------------|-------------------------------------------------------|---------------------------------------------------|----------------------|----------------------------------|---------------------------------------------------------|---------------------------------------------------------------------------------------|------------------------|
| The effects of skin lesion segmentation on the performance of dermoscopic image classification <sup>69</sup>    | 32882594 | 2020     | ISIC 2017                             | Train, Internal Validation, Test                                              | 2750                  | Not specified      | Dermoscopic             | Benign nevi, seborrheic keratosis, melanoma                                                                                                                       | Benign nevi: expert consensus, Seborrheic keratosis: expert consensus, Melanoma: pathology                                                                                                                                                                              | Nevus: Y<br>Seborrheic keratosis: Y<br>Melanoma: Y                                                                                                                                                      | N                                                     | N                                                 | Y                    | Y                                | N                                                       | N                                                                                     | N                      |
|                                                                                                                 |          |          | ISIC 2018 Challenge (HAM10000)        | Train, Test                                                                   | 10015                 | Not specified      | Dermoscopic             | Actinic keratosis, Intraepithelial carcinoma (Bowen's), Basal cell carcinoma, Benign keratosis, Dermatofibroma, Melanocytic nevi, Vascular skin lesions, Melanoma | Actinic keratosis: consensus<br>Intraepithelial carcinoma (Bowen's): pathology<br>Basal cell carcinoma: pathology<br>Benign keratosis: consensus<br>Dermatofibroma: consensus<br>Melanocytic nevi: consensus<br>Vascular skin lesions: consensus<br>Melanoma: consensus | Actinic keratosis: Y<br>Intraepithelial carcinoma (Bowen's): Y<br>Basal cell carcinoma: Y<br>Benign keratosis: Y<br>Dermatofibroma: Y<br>Melanocytic nevi: Y<br>Vascular skin lesions: Y<br>Melanoma: Y | N                                                     | N                                                 | Y                    | Y                                |                                                         |                                                                                       |                        |
| Towards improving diagnosis of skin diseases by combining deep neural network and human knowledge <sup>70</sup> | 30066649 | 2018     | Peking Union Medical College Hospital | Train, Internal Validation, Test                                              | 1067                  | Not specified      | Dermoscopic             | Melanocytic nevus, seborrheic keratosis, basal cell carcinoma, psoriasis dermoscopic                                                                              | Dermoscopic image reviewed by two dermatologists → if consensus, image labeled; if no consensus, a third dermatologist assessed → if common agreement reached, image labeled; if no common agreement reached, histopathological biopsy performed, then imaged labeled   | Cannot be determined                                                                                                                                                                                    | N                                                     | N                                                 | N                    | Y                                | N                                                       | N                                                                                     | N                      |





## eMethods. Gold Standard Used

The following diseases (as identified in “Disease” column) require biopsy/histopathological diagnosis to meet the gold standard:

- Melanoma
- Dysplastic nevi
- Basal cell carcinoma
- Squamous cell carcinoma
- “High risk” pigmented lesions
- Intraepithelial carcinoma (Bowen’s disease)

For all other diseases, clinical exam with consensus among experienced dermatologists +/- long term (i.e. 2 year) follow-up is sufficient to meet the gold standard.

## eFigure. Mappings

Number Dataset or Paper

- 1 ISIC
- 2 MED-NODE: University Medical Center Groningen
- 3 Hellenic Dermatological Atlas
- 4 D@nderm Atlas of Clinical Dermatology ( <http://www.danderm.dk/atlas>)
- 5 Visualdx
- 6 Neurovascular Ulcers Outpatient Clinic of the Clinical Hospital of the University of São Paulo, Ribeirão Preto, São Paulo, Brazil
- 7 PMID 29513718 data
- 8 Edinburgh Edinburgh Dermofit Image Library
- 9 SNU dataset: Department of Dermatology at Seoul National University, Bundang Hospital, Inje University Sanggye Paik Hospital, and Hallym University Dongtan Hospital.
- 10 Dermquest (<http://dermquest.com>)
- 11 Interactive Derm Atlas ( <http://www.dermatlas.net>)
- 12 DermIS (<https://www.dermis.net/dermisroot/en/home/index.htm>)
- 13 Loyola University Dermatology Medical Education Website (<http://www.meddean.luc.edu/lumen/MedEd/medicine/dermatology/melton/atlas.htm>)
- 14 Dermatoweb (<http://www.dermatoweb.net/>)
- 15 Dermatology Atlas (<http://www.atlasdermatologico.com.br/>)
- 16 Yonsei University Wonju Severance Christian Hospital Alopecia areata
- 17 DermNet NZ
- 18 DermWeb ([http://www.dermweb.com/photo\\_atlas/](http://www.dermweb.com/photo_atlas/))
- 19 Asan Medical Center PMID 29352285
- 20 Inje University PMID 29352285
- 21 Hallym University PMID 29352285
- 22 Seoul National University PMID 29352285
- 23 PH2
- 24 Interactive Atlas of Dermoscopy published by EDRA
- 25 Seven-point Checklist Dermatology Dataset (<http://derm.cs.sfu.ca>)
- 26 <http://www.bccancer.bc.ca/health-professionals/clinical-resources/skin-cancer-atlas>
- 27 2018 JID editorial images (hosted by ISIC website)
- 28 Teledermatology service serving 17 primary-care and specialist sites from two states in the United States.
- 29 Department of Dermatology, The Second Xiangya Hospital, Central South University, China
- 30 Dermatology practices across India
- 31 All India Institute of Medical Sciences in New Delhi, an urban private practice in Gurugram, Haryana, India, and a rural health center in Jhajjar, Haryana, India
- 32 Taipei Medical University
- 33 PMID 33065109 Dataset 1
- 34 PMID 33065109 Dataset 2
- 35 PMID 28569993 Train set

36 PMID 28569993 Test set  
37 7 United Kingdom hospitals  
38 Department of Dermatology, University of Heidelberg  
39 ASAN: Department of Dermatology at Asan Medical Center  
40 Normal: scraped from the internet and lesions cropped out from ASAN  
41 Web: scraped from the internet  
42 PMID 30654165 Online images  
43 Mid-Atlantic region research participants  
44 ASAN: Department of Dermatology at Asan Medical Center PMID 29428356  
45 Additional ASAN: Department of Dermatology at Asan Medical Center PMID 29428356  
46 Hallym dataset: Dongtan Sacred Heart Hospital, Hallym University, and Sanggye Paik Hospital, Inje University  
47 PMID 31140653 Google Images  
48 Department of Dermatology, Aarhus University Hospital (AUH), Denmark  
49 Dataset I: Department of Dermatology, Peking Union Medical College Hospital  
50 Dataset II: Department of Dermatology, Peking Union Medical College Hospital  
51 University of Tsukuba Hospital  
52 Stanford hospital PMID 28117445  
53 Shinshu Department of Dermatology at Shinshu University Hospital  
54 PMID 31921498 "a variety of other sources"  
55 Acne dataset collected from France, South Africa, China, India  
56 Hospital for Skin Diseases at the Chinese Academy of Medical Science  
57 Department of Dermatology, Kaohsiung Chang Gung Memorial Hospital in Taiwan  
58 PRIV  
59 Department of Dermatology of the China-Japan Friendship Hospital  
60 Collected from the departments of dermatology of the university medical centres of Heidelberg, Göttingen, and from the medical centre Thalkirchner Straße, Munich  
61 PMID 28332777 Diagnostic performance of MelaFind  
62 Clinical images from primary skin cancer clinic in Queensland, Australia  
63 Dermoscopic images from primary skin cancer clinic in Queensland, Australia  
64 Educational slides photographed and excised in the practice of one of the authors.  
65 Multiple sources, including the Medical University of Vienna, the image database from C.R., and a convenience sample of rare diagnoses.  
66 PMID 32572267 Telemedicine dataset  
67 Department of Dermatology at the Medical University of Vienna for dermoscopy images taken between April and September 2019  
68 Primary training dataset (Asan Medical Center, MED-NODE, Seven-point Checklist Dermatology Dataset, images on the internet).  
69 Asan Medical Center Validation  
70 Hallym National University Validation  
71 Chonnam University Validaiton  
72 PMID 31912788 convenience sample  
73 Validated image library of the Department of Dermatology, University of Heidelberg, Germany  
74 6 dermoscopic image sets were randomly selected from image libraries of Departments of Dermatology, Universities of Heidelberg, Munich and Lyon  
75 Not specified other than a "Multiple skin cancer clinics"  
76 Images collected from patients at increased melanoma risk PMID 32534243  
77 Images from dermatologists across India  
78 PMID 33040407 Test set  
79 Patients from telemedicine dermatology visits from a single academic medical center  
80 PMID 32525908 Dataset  
81 Department of Burn Reconstruction Surgery, Xiangya Hospital  
82 ROS-NET Ohio State University (OSU) Division of Dermatology  
83 XiangyaDerm-Pso9  
84 XiangyaDerm  
85 Department Dermatologic Oncology in the National Cancer Center Hospital (Tokyo, Japan)

86 Peking Union Medical College Hospital

87 PMID 30852421  
88 PMID 32424212  
89 PMID 32566608  
90 PMID 32526536  
91 PMID 32991767  
92 PMID 31907926  
93 PMID 33065109  
94 PMID 28569993  
95 PMID 31542688  
96 PMID 29513718  
97 PMID 32915161  
98 PMID 31255749  
99 PMID 31693116  
100 PMID 31411641  
101 PMID 32243882  
102 PMID 30654165  
103 PMID 29428356  
104 PMID 32785607  
105 PMID 32931808  
106 PMID 31201137  
107 PMID 31306724  
108 PMID 31140653  
109 PMID 33221639  
110 PMID 33072786  
111 PMID 30981091  
112 PMID 32826613  
113 PMID 33218060  
114 PMID 31401469  
115 PMID 29352285  
116 PMID 29953582  
117 PMID 28117445  
118 PMID 33063398  
119 PMID 31921498  
120 PMID 31446631  
121 PMID 32772400  
122 PMID 33211346  
123 PMID 30207594  
124 PMID 32810047  
125 PMID 31856342  
126 PMID 28332777  
127 PMID 32435646  
128 PMID 31233565  
129 PMID 30484822  
130 PMID 31946474  
131 PMID 32572267  
132 PMID 31799995  
133 PMID 31912788  
134 PMID 29846502  
135 PMID 28268581

136 PMID 32252036  
137 PMID 31972395  
138 PMID 33049269  
139 PMID 30187575  
140 PMID 32028084  
141 PMID 26872778  
142 PMID 32534243  
143 PMID 33040407  
144 PMID 33037709  
145 PMID 32525908  
146 PMID 32826097  
147 PMID 31327058  
148 PMID 28969863  
149 PMID 31849118  
150 PMID 31541556  
151 PMID 31518967  
152 PMID 31419752  
153 PMID 31300897  
154 PMID 32751349  
155 PMID 32882594  
156 PMID 30066649

## References

1. Brinker TJ, Hekler A, Enk AH, et al. A convolutional neural network trained with dermoscopic images performed on par with 145 dermatologists in a clinical melanoma image classification task. *Eur J Cancer*. 04 2019;111:148-154. doi:10.1016/j.ejca.2019.02.005
2. Liu Y, Jain A, Eng C, et al. A deep learning system for differential diagnosis of skin diseases. *Nat Med*. 06 2020;26(6):900-908. doi:10.1038/s41591-020-0842-3
3. Wu H, Yin H, Chen H, et al. A deep learning, image based approach for automated diagnosis for inflammatory skin diseases. *Ann Transl Med*. May 2020;8(9):581. doi:10.21037/atm.2020.04.39
4. Qin Z, Liu Z, Zhu P, Xue Y. A GAN-based image synthesis method for skin lesion classification. *Comput Methods Programs Biomed*. Oct 2020;195:105568. doi:10.1016/j.cmpb.2020.105568
5. Pangti R, Mathur J, Chouhan V, et al. A machine learning-based, decision support, mobile phone application for diagnosis of common dermatological diseases. *J Eur Acad Dermatol Venereol*. Feb 2021;35(2):536-545. doi:10.1111/jdv.16967

6. Chin YPH, Hou ZY, Lee MY, et al. A patient-oriented, general-practitioner-level, deep-learning-based cutaneous pigmented lesion risk classifier on a smartphone. *Br J Dermatol*. 06 2020;182(6):1498-1500. doi:10.1111/bjd.18859
7. Dulmage B, Tegtmeier K, Zhang MZ, Colavincenzo M, Xu S. A Point-of-Care, Real-Time Artificial Intelligence System to Support Clinician Diagnosis of a Wide Range of Skin Diseases. *J Invest Dermatol*. May 2021;141(5):1230-1235. doi:10.1016/j.jid.2020.08.027
8. Tschandl P, Kittler H, Argenziano G. A pretrained neural network shows similar diagnostic accuracy to medical students in categorizing dermatoscopic images after comparable training conditions. *Br J Dermatol*. 09 2017;177(3):867-869. doi:10.1111/bjd.15695
9. Blanco G, Traina AJM, Traina C, et al. A superpixel-driven deep learning approach for the analysis of dermatological wounds. *Comput Methods Programs Biomed*. Jan 2020;183:105079. doi:10.1016/j.cmpb.2019.105079
10. Yu C, Yang S, Kim W, et al. Acral melanoma detection using a convolutional neural network for dermoscopy images. *PLoS One*. 2018;13(3):e0193321. doi:10.1371/journal.pone.0193321
11. Maron RC, Utikal JS, Hekler A, et al. Artificial Intelligence and Its Effect on Dermatologists' Accuracy in Dermoscopic Melanoma Image Classification: Web-Based Survey Study. *J Med Internet Res*. 09 2020;22(9):e18091. doi:10.2196/18091
12. Cui X, Wei R, Gong L, et al. Assessing the effectiveness of artificial intelligence methods for melanoma: A retrospective review. *J Am Acad Dermatol*. Nov 2019;81(5):1176-1180. doi:10.1016/j.jaad.2019.06.042
13. Phillips M, Marsden H, Jaffe W, et al. Assessment of Accuracy of an Artificial Intelligence Algorithm to Detect Melanoma in Images of Skin Lesions. *JAMA Netw Open*. 10 2019;2(10):e1913436. doi:10.1001/jamanetworkopen.2019.13436
14. Winkler JK, Fink C, Toberer F, et al. Association Between Surgical Skin Markings in Dermoscopic Images and Diagnostic Performance of a Deep Learning Convolutional Neural Network for Melanoma Recognition. *JAMA Dermatol*. Oct 2019;155(10):1135-1141. doi:10.1001/jamadermatol.2019.1735
15. Han SS, Park I, Eun Chang S, et al. Augmented Intelligence Dermatology: Deep Neural Networks Empower Medical Professionals in Diagnosing Skin Cancer and Predicting Treatment Options for 134 Skin Disorders. *J Invest Dermatol*. 09 2020;140(9):1753-1761. doi:10.1016/j.jid.2020.01.019
16. Burlina PM, Joshi NJ, Ng E, Billings SD, Rebman AW, Aucott JN. Automated detection of erythema migrans and other confounding skin lesions via deep learning. *Comput Biol Med*. 02 2019;105:151-156. doi:10.1016/j.combiomed.2018.12.007
17. Han SS, Kim MS, Lim W, Park GH, Park I, Chang SE. Classification of the Clinical Images for Benign and Malignant Cutaneous Tumors Using a Deep Learning Algorithm. *J Invest Dermatol*. 07 2018;138(7):1529-1538. doi:10.1016/j.jid.2018.01.028
18. Lee S, Lee JW, Choe SJ, et al. Clinically Applicable Deep Learning Framework for Measurement of the Extent of Hair Loss in Patients With Alopecia Areata. *JAMA Dermatol*. 09 2020;156(9):1018-1020. doi:10.1001/jamadermatol.2020.2188
19. Du-Harpur X, Arthurs C, Ganier C, et al. Clinically Relevant Vulnerabilities of Deep Machine Learning Systems for Skin Cancer Diagnosis. *J Invest Dermatol*. Apr 2021;141(4):916-920. doi:10.1016/j.jid.2020.07.034

20. Tschandl P, Codella N, Akay BN, et al. Comparison of the accuracy of human readers versus machine-learning algorithms for pigmented skin lesion classification: an open, web-based, international, diagnostic study. *Lancet Oncol.* 07 2019;20(7):938-947. doi:10.1016/S1470-2045(19)30333-X
21. Marchetti MA, Liopyris K, Dusza SW, et al. Computer algorithms show potential for improving dermatologists' accuracy to diagnose cutaneous melanoma: Results of the International Skin Imaging Collaboration 2017. *J Am Acad Dermatol.* Mar 2020;82(3):622-627. doi:10.1016/j.jaad.2019.07.016
22. Aggarwal SLP. Data augmentation in dermatology image recognition using machine learning. *Skin Res Technol.* Nov 2019;25(6):815-820. doi:10.1111/srt.12726
23. Goceri E. Deep learning based classification of facial dermatological disorders. *Comput Biol Med.* 01 2021;128:104118. doi:10.1016/j.combiomed.2020.104118
24. Thomsen K, Christensen AL, Iversen L, Lomholt HB, Winther O. Deep Learning for Diagnostic Binary Classification of Multiple-Lesion Skin Diseases. *Front Med (Lausanne).* 2020;7:574329. doi:10.3389/fmed.2020.574329
25. Brinker TJ, Hekler A, Enk AH, et al. Deep learning outperformed 136 of 157 dermatologists in a head-to-head dermoscopic melanoma image classification task. *Eur J Cancer.* 05 2019;113:47-54. doi:10.1016/j.ejca.2019.04.001
26. Wang SQ, Zhang XY, Liu J, et al. Deep learning-based, computer-aided classifier developed with dermoscopic images shows comparable performance to 164 dermatologists in cutaneous disease diagnosis in the Chinese population. *Chin Med J (Engl).* Sep 2020;133(17):2027-2036. doi:10.1097/CM9.0000000000001023
27. Lucius M, De All J, De All JA, et al. Deep Neural Frameworks Improve the Accuracy of General Practitioners in the Classification of Pigmented Skin Lesions. *Diagnostics (Basel).* Nov 2020;10(11)doi:10.3390/diagnostics10110969
28. Brinker TJ, Hekler A, Enk AH, et al. Deep neural networks are superior to dermatologists in melanoma image classification. *Eur J Cancer.* 09 2019;119:11-17. doi:10.1016/j.ejca.2019.05.023
29. Han SS, Park GH, Lim W, et al. Deep neural networks show an equivalent and often superior performance to dermatologists in onychomycosis diagnosis: Automatic construction of onychomycosis datasets by region-based convolutional deep neural network. *PLoS One.* 2018;13(1):e0191493. doi:10.1371/journal.pone.0191493
30. Fujisawa Y, Otomo Y, Ogata Y, et al. Deep-learning-based, computer-aided classifier developed with a small dataset of clinical images surpasses board-certified dermatologists in skin tumour diagnosis. *Br J Dermatol.* 02 2019;180(2):373-381. doi:10.1111/bjd.16924
31. Esteva A, Kuprel B, Novoa RA, et al. Dermatologist-level classification of skin cancer with deep neural networks. *Nature.* 02 2017;542(7639):115-118. doi:10.1038/nature21056
32. Minagawa A, Koga H, Sano T, et al. Dermoscopic diagnostic performance of Japanese dermatologists for skin tumors differs by patient origin: A deep learning convolutional neural network closes the gap. *J Dermatol.* Feb 2021;48(2):232-236. doi:10.1111/1346-8138.15640

33. Phillips M, Greenhalgh J, Marsden H, Palamaras I. Detection of Malignant Melanoma Using Artificial Intelligence: An Observational Study of Diagnostic Accuracy. *Dermatol Pract Concept*. 2020;10(1):e2020011. doi:10.5826/dpc.1001a11
34. Seité S, Khammari A, Benzaquen M, Moyal D, Dréno B. Development and accuracy of an artificial intelligence algorithm for acne grading from smartphone photographs. *Exp Dermatol*. 11 2019;28(11):1252-1257. doi:10.1111/exd.14022
35. Yang Y, Ge Y, Guo L, et al. Development and validation of two artificial intelligence models for diagnosing benign, pigmented facial skin lesions. *Skin Res Technol*. Jan 2021;27(1):74-79. doi:10.1111/srt.12911
36. Huang HW, Hsu BW, Lee CH, Tseng VS. Development of a light-weight deep learning model for cloud applications and remote diagnosis of skin cancers. *J Dermatol*. Mar 2021;48(3):310-316. doi:10.1111/1346-8138.15683
37. Tschandl P, Argenziano G, Razmara M, Yap J. Diagnostic accuracy of content-based dermatoscopic image retrieval with deep classification features. *Br J Dermatol*. 07 2019;181(1):155-165. doi:10.1111/bjd.17189
38. Li CX, Fei WM, Shen CB, et al. Diagnostic capacity of skin tumor artificial intelligence-assisted decision-making software in real-world clinical settings. *Chin Med J (Engl)*. Sep 2020;133(17):2020-2026. doi:10.1097/CM9.0000000000001002
39. Fink C, Blum A, Buhl T, et al. Diagnostic performance of a deep learning convolutional neural network in the differentiation of combined naevi and melanomas. *J Eur Acad Dermatol Venereol*. Jun 2020;34(6):1355-1361. doi:10.1111/jdv.16165
40. Fink C, Jaeger C, Jaeger K, Haenssle HA. Diagnostic performance of the MelaFind device in a real-life clinical setting. *J Dtsch Dermatol Ges*. Apr 2017;15(4):414-419. doi:10.1111/ddg.13220
41. Hekler A, Kather JN, Krieghoff-Henning E, et al. Effects of Label Noise on Deep Learning-Based Skin Cancer Classification. *Front Med (Lausanne)*. 2020;7:177. doi:10.3389/fmed.2020.00177
42. Brinker TJ, Hekler A, Enk AH, von Kalle C. Enhanced classifier training to improve precision of a convolutional neural network to identify images of skin lesions. *PLoS One*. 2019;14(6):e0218713. doi:10.1371/journal.pone.0218713
43. Tschandl P, Rosendahl C, Akay BN, et al. Expert-Level Diagnosis of Nonpigmented Skin Cancer by Combined Convolutional Neural Networks. *JAMA Dermatol*. 01 2019;155(1):58-65. doi:10.1001/jamadermatol.2018.4378
44. Li X, Wu J, Chen EZ, Jiang H. From Deep Learning Towards Finding Skin Lesion Biomarkers. *Annu Int Conf IEEE Eng Med Biol Soc*. Jul 2019;2019:2797-2800. doi:10.1109/EMBC.2019.8857334
45. Tschandl P, Rinner C, Apalla Z, et al. Human-computer collaboration for skin cancer recognition. *Nat Med*. Jun 2020;doi:10.1038/s41591-020-0942-0
46. Han SS, Moon IJ, Lim W, et al. Keratinocytic Skin Cancer Detection on the Face Using Region-Based Convolutional Neural Network. *JAMA Dermatol*. Dec 2019;doi:10.1001/jamadermatol.2019.3807
47. Haenssle HA, Fink C, Toberer F, et al. Man against machine reloaded: performance of a market-approved convolutional neural network in classifying a broad spectrum of skin lesions in comparison with 96 dermatologists working under less artificial conditions. *Ann Oncol*. 01 2020;31(1):137-143. doi:10.1016/j.annonc.2019.10.013

48. Haenssle HA, Fink C, Schneiderbauer R, et al. Man against machine: diagnostic performance of a deep learning convolutional neural network for dermoscopic melanoma recognition in comparison to 58 dermatologists. *Ann Oncol*. 08 2018;29(8):1836-1842. doi:10.1093/annonc/mdy166
49. Nasr-Esfahani E, Samavi S, Karimi N, et al. Melanoma detection by analysis of clinical images using convolutional neural network. *Annu Int Conf IEEE Eng Med Biol Soc*. Aug 2016;2016:1373-1376. doi:10.1109/EMBC.2016.7590963
50. Zunair H, Ben Hamza A. Melanoma detection using adversarial training and deep transfer learning. *Phys Med Biol*. 07 2020;65(13):135005. doi:10.1088/1361-6560/ab86d3
51. Winkler JK, Sies K, Fink C, et al. Melanoma recognition by a deep learning convolutional neural network-Performance in different melanoma subtypes and localisations. *Eur J Cancer*. 03 2020;127:21-29. doi:10.1016/j.ejca.2019.11.020
52. Navarrete-Dechent C, Liopyris K, Marchetti MA. Multiclass Artificial Intelligence in Dermatology: Progress but Still Room for Improvement. *J Invest Dermatol*. May 2021;141(5):1325-1328. doi:10.1016/j.jid.2020.06.040
53. Yap J, Yolland W, Tschandl P. Multimodal skin lesion classification using deep learning. *Exp Dermatol*. 11 2018;27(11):1261-1267. doi:10.1111/exd.13777
54. Al-Masni MA, Kim DH, Kim TS. Multiple skin lesions diagnostics via integrated deep convolutional networks for segmentation and classification. *Comput Methods Programs Biomed*. Jul 2020;190:105351. doi:10.1016/j.cmpb.2020.105351
55. Premaladha J, Ravichandran KS. Novel Approaches for Diagnosing Melanoma Skin Lesions Through Supervised and Deep Learning Algorithms. *J Med Syst*. Apr 2016;40(4):96. doi:10.1007/s10916-016-0460-2
56. Sies K, Winkler JK, Fink C, et al. Past and present of computer-assisted dermoscopic diagnosis: performance of a conventional image analyser versus a convolutional neural network in a prospective data set of 1,981 skin lesions. *Eur J Cancer*. 08 2020;135:39-46. doi:10.1016/j.ejca.2020.04.043
57. Pangti R, Chouhan V, Mathur J, et al. Performance of a deep learning-based application for the diagnosis of basal cell carcinoma in Indian patients as compared to dermatologists and nondermatologists. *Int J Dermatol*. Feb 2021;60(2):e51-e52. doi:10.1111/ijd.15242
58. Muñoz-López C, Ramírez-Cornejo C, Marchetti MA, et al. Performance of a deep neural network in teledermatology: a single-centre prospective diagnostic study. *J Eur Acad Dermatol Venereol*. Feb 2021;35(2):546-553. doi:10.1111/jdv.16979
59. Kim YJ, Han SS, Yang HJ, Chang SE. Prospective, comparative evaluation of a deep neural network and dermoscopy in the diagnosis of onychomycosis. *PLoS One*. 2020;15(6):e0234334. doi:10.1371/journal.pone.0234334
60. Wang Y, Ke Z, He Z, et al. Real-time burn depth assessment using artificial networks: a large-scale, multicentre study. *Burns*. 12 2020;46(8):1829-1838. doi:10.1016/j.burns.2020.07.010
61. Saba T, Khan MA, Rehman A, Marie-Sainte SL. Region Extraction and Classification of Skin Cancer: A Heterogeneous framework of Deep CNN Features Fusion and Reduction. *J Med Syst*. Jul 2019;43(9):289. doi:10.1007/s10916-019-1413-3



62. Marchetti MA, Codella NCF, Dusza SW, et al. Results of the 2016 International Skin Imaging Collaboration International Symposium on Biomedical Imaging challenge: Comparison of the accuracy of computer algorithms to dermatologists for the diagnosis of melanoma from dermoscopic images. *J Am Acad Dermatol*. 02 2018;78(2):270-277.e1. doi:10.1016/j.jaad.2017.08.016
63. Binol H, Plotner A, Sopkovich J, Kaffenberger B, Niazi MKK, Gurcan MN. Ros-NET: A deep convolutional neural network for automatic identification of rosacea lesions. *Skin Res Technol*. May 2020;26(3):413-421. doi:10.1111/srt.12817
64. Zhao S, Xie B, Li Y, et al. Smart identification of psoriasis by images using convolutional neural networks: a case study in China. *J Eur Acad Dermatol Venereol*. Mar 2020;34(3):518-524. doi:10.1111/jdv.15965
65. Hekler A, Utikal JS, Enk AH, et al. Superior skin cancer classification by the combination of human and artificial intelligence. *Eur J Cancer*. 10 2019;120:114-121. doi:10.1016/j.ejca.2019.07.019
66. Maron RC, Weichenthal M, Utikal JS, et al. Systematic outperformance of 112 dermatologists in multiclass skin cancer image classification by convolutional neural networks. *Eur J Cancer*. 09 2019;119:57-65. doi:10.1016/j.ejca.2019.06.013
67. Zhao XY, Wu X, Li FF, et al. The Application of Deep Learning in the Risk Grading of Skin Tumors for Patients Using Clinical Images. *J Med Syst*. Jul 2019;43(8):283. doi:10.1007/s10916-019-1414-2
68. Jinnai S, Yamazaki N, Hirano Y, Sugawara Y, Ohe Y, Hamamoto R. The Development of a Skin Cancer Classification System for Pigmented Skin Lesions Using Deep Learning. *Biomolecules*. 07 2020;10(8)doi:10.3390/biom10081123
69. Mahbod A, Tschandl P, Langs G, Ecker R, Ellinger I. The effects of skin lesion segmentation on the performance of dermoscopic image classification. *Comput Methods Programs Biomed*. Dec 2020;197:105725. doi:10.1016/j.cmpb.2020.105725
70. Zhang X, Wang S, Liu J, Tao C. Towards improving diagnosis of skin diseases by combining deep neural network and human knowledge. *BMC Med Inform Decis Mak*. 07 2018;18(Suppl 2):59. doi:10.1186/s12911-018-0631-9
